# Supplementary material for: Asthma management and control in children, adolescents, and adults in 25 countries: a Global Asthma Network Phase I cross-sectional study
Source: PubMed Central journal article supplement — Lancet Glob Health. 2023 Jan 18;11(2):e218–28. doi: 10.1016/S2214-109X(22)00506-X (PMC9885426; doi:10.1016/s2214-109x(22)00506-x), 2023-01-18
Supplement: mmc1.pdf [file mmc1.pdf]

# THE LANCET

## Global Health

### Supplementary appendix 1

This translation in Spanish was submitted by the authors and we reproduce it as supplied. It has not been peer reviewed. *The Lancet's* editorial processes have only been applied to the original in English, which should serve as reference for this manuscript.

Los autores nos proporcionaron esta traducción al español y la reproducimos tal como nos fue entregada. No la hemos revisado. Los procesos editoriales de *The Lancet* se han aplicado únicamente al original en inglés, que debe servir de referencia para este manuscrito.

Supplement to: García-Marcos L, Chiang C-Y, Asher MI, et al. Asthma management and control in children, adolescents, and adults in 25 countries: a Global Asthma Network Phase I cross-sectional study. *Lancet Glob Health* 2023; **11**: e218–28.

## Resumen

**Antecedentes** El asma es una de las enfermedades no transmisibles más frecuentes globalmente. Este estudio tuvo como objetivo evaluar el uso de medicación para el asma, la disponibilidad de planes para su manejo, y el control de la enfermedad en la niñez, la adolescencia y la edad adulta.

**Métodos** Se usaron datos del estudio epidemiológico transversal “Global Asthma Network (GAN) Phase I” (2015-2020). Se distribuyó, a través de los colegios, un cuestionario escrito y validado a tres grupos de edad (niños, 6-7 años; adolescentes, 13-14 años; y adultos,  $\geq 19$  años). Los adultos elegibles fueron los padres o tutores de los niños y adolescentes incluidos en la encuesta. Se recogieron las respuestas sobre el uso de medicamentos para el asma en el año anterior (tipo de medicación inhalada u oral, y frecuencia de uso) en los individuos con asma diagnosticada por un médico. Las preguntas sobre síntomas de asma y consultas médicas se usaron para definir la gravedad de los síntomas en el año anterior, y para establecer el grado de control del asma. Las categorías de renta de los países se establecieron en base al producto interior bruto per cápita siguiendo la clasificación del Banco Mundial de 2020. Para describir los resultados se usaron las proporciones (y los IC 95% agrupados por centros). Se usaron modelos de ecuaciones estructurales generalizadas multinivel para valorar los factores asociados con la toma de medicamentos y con el mal control del asma en cada grupo de edad.

**Hallazgos** En total se incluyeron 453 473 individuos de 63 centros provenientes de 25 países, que comprendieron 101 777 niños (6445 [6.3%] con asma diagnosticada por un médico), 157 784 adolescentes (12 532 [7.9%]), y 193 912 adultos (6677 [3.4%]). El uso de medicamentos para el asma varió dependiendo de la gravedad de los síntomas y de la categoría de renta del país. Los medicamentos más frecuentemente utilizados en el año anterior fueron los  $\beta 2$  agonistas de acción corta (SABA; rango entre todos los grupos de edad, 29.3–85.3% de los participantes) y los corticoides inhalados (12.6–51.9%). La proporción de individuos con síntomas de asma grave que no tomaban corticoides inhalados (corticoides inhalados sólo o con  $\beta 2$  agonistas de acción prolongada) fue alta en todos los grupos de edad (934 [44.8%] de 2085 niños, 2011 [60.1%] de 3345 adolescentes, y 1142 [55.5%] de 2058 adultos), y fue significativamente mayor en los países de renta media a baja. Los SABA orales y la teofilina se usaron en todos los grupos de edad y categorías de renta nacional, en contra de las actuales guías de tratamiento. Los planes de tratamiento de asma fueron usados por 4049 (62.8%) niños, 6694 (53.4%) adolescentes, y 3168 (47.4%) adultos; y 2840 (44.1%) niños, 6942 (55.4%) adolescentes, y 4081 (61.1%) adultos tuvieron su asma bien controlada. Independientemente de la renta nacional y de la gravedad del asma, tener un plan de manejo de asma se asoció significativamente con el uso de cualquier tipo de medicamento inhalado (odds ratio ajustada [OR] 2.75 [IC 95% 2.40–3.15] para los niños; 2.45 [2.25–2.67] para los adolescentes; y 2.75 [2.38–3.16] para los adultos) o cualquier tipo de medicamento oral (1.86 [1.63–2.12] para los niños; 1.53 [1.40–1.68] para los adolescentes; y 1.78 [1.55–2.04] para los adultos). Un mal control del asma se asoció con una renta nacional baja (países de renta media-baja y baja frente a países de renta alta, OR ajustadas 2.33 [IC 95% 1.32–4.14] para niños; 3.46 [1.83–6.54] para adolescentes; y 4.86 [2.55–9.26] para adultos).

**Interpretación** El manejo del asma y su control es inadecuado con frecuencia, particularmente en áreas con bajos recursos. Deberían implementarse estrategias para mejorar la adherencia a las guías de tratamiento de asma en todo el mundo, con énfasis en el acceso a medicamentos esenciales para el asma que sean asequibles y de calidad asegurada especialmente en países de renta baja y media-baja.
