# Supplementary material for: Asthma management and control in children, adolescents, and adults in 25 countries: a Global Asthma Network Phase I cross-sectional study
Source: PubMed Central journal article supplement — Lancet Glob Health. 2023 Jan 18;11(2):e218–28. doi: 10.1016/S2214-109X(22)00506-X (PMC9885426; doi:10.1016/s2214-109x(22)00506-x), 2023-01-18
Supplement: mmc2.pdf [file mmc2.pdf]

# THE LANCET

## Global Health

### Supplementary appendix 2

This appendix formed part of the original submission and has been peer reviewed. We post it as supplied by the authors.

Supplement to: García-Marcos L, Chiang C-Y, Asher MI, et al. Asthma management and control in children, adolescents, and adults in 25 countries: a Global Asthma Network Phase I cross-sectional study. *Lancet Glob Health* 2023; **11**: e218–28.

# ASTHMA MANAGEMENT AND CONTROL IN CHILDREN, ADOLESCENTS AND ADULTS: GLOBAL ASTHMA NETWORK (GAN) PHASE I CROSS-SECTIONAL STUDY.

## Supplementary material (web tables, figures and study group).

|                                                                                                                                                                                                                                                       | Page |
|-------------------------------------------------------------------------------------------------------------------------------------------------------------------------------------------------------------------------------------------------------|------|
| <b>Web table 1.</b> Number of participants and doctor diagnosed asthma per age group, by country income category, country and centre (not every centre contributed to all age groups).                                                                | 3    |
| <b>Web table 2.</b> Proportion (and 95% confidence interval clustered by centre) of children receiving inhaled and oral asthma medicines and having a management plan according to the severity of symptoms stratified by country income category.    | 5    |
| <b>Web table 3.</b> Proportion (and 95% confidence interval clustered by centre) of adolescents receiving inhaled and oral asthma medicines and having a management plan according to the severity of symptoms stratified by country income category. | 6    |
| <b>Web table 4.</b> Proportion (and 95% confidence interval clustered by centre) of adults receiving inhaled and oral asthma medicines and having a management plan according to the severity of symptoms stratified by country income category.      | 7    |
| <b>Web table 5.</b> Proportion (and 95% confidence interval clustered by centre) of children receiving inhaled medicines (and their regimens) according to the severity of symptoms stratified by country income category.                            | 8    |
| <b>Web table 6.</b> Proportion (and 95% confidence interval clustered by centre) of children receiving oral medicines (and their regimens) according to the severity of symptoms stratified by country income category.                               | 9    |
| <b>Web table 7.</b> Proportion (and 95% confidence interval clustered by centre) of adolescents receiving inhaled medicines (and their regimens) according to the severity of symptoms stratified by country income category.                         | 10   |
| <b>Web table 8.</b> Proportion (and 95% confidence interval clustered by centre) of adolescents receiving oral medicines (and their regimens) according to the severity of symptoms stratified by country income category.                            | 11   |
| <b>Web table 9.</b> Proportion (and 95% confidence interval clustered by centre) of adults receiving inhaled medicines (and their regimens) according to severity of symptoms stratified by country income category.                                  | 12   |
| <b>Web table 10.</b> Proportion (and 95% confidence interval clustered by centre) of adults receiving oral medicines (and their regimens) according to the severity of symptoms stratified by country income category.                                | 13   |
| <b>Web table 11.</b> Association between receiving asthma medicine regimens and the severity of symptoms, having an asthma management plan and country income category among children.                                                                | 14   |
| <b>Web table 12.</b> Association between receiving asthma medicine regimens and the severity of symptoms, having an asthma management plan and country income category among adolescents.                                                             | 15   |

|                                                                                                                                                                                                                                                  |    |
|--------------------------------------------------------------------------------------------------------------------------------------------------------------------------------------------------------------------------------------------------|----|
| <b>Web table 13.</b> Association between receiving asthma medicine regimens and the severity of symptoms, having an asthma management plan and country income category among adults.                                                             | 16 |
| <b>Web Table 14.</b> Factors associated to poor control of asthma among children in the multilevel analysis.                                                                                                                                     | 17 |
| <b>Web Table 15.</b> Factors associated to poor control of asthma among adolescents in the multilevel analysis.                                                                                                                                  | 18 |
| <b>Web Table 16.</b> Factors associated to poor control of asthma among adults in the multilevel analysis.                                                                                                                                       | 19 |
| <b>Web figure 1.</b> Proportions of A) severity of symptoms and B) degree of asthma control among children, adolescents, and adults in the whole populations and by country income category.                                                     | 20 |
| <b>Web figure 2.</b> Proportion of children, adolescents and adults with severe symptoms who were not on inhaled corticosteroids with or without long-acting beta-2 agonists in the whole populations and stratified by country income category. | 21 |
| <b>Global Asthma Network Study Group.</b>                                                                                                                                                                                                        | 22 |

**Web table 1. Number of participants and doctor diagnosed asthma per age group, by country income category\*, country, and centre (not every centre contributed to all age groups).**

| Country income category | Country                 | Centre                   | Children     |                  |      | Adolescents  |                  |      | Adults       |                  |      |
|-------------------------|-------------------------|--------------------------|--------------|------------------|------|--------------|------------------|------|--------------|------------------|------|
|                         |                         |                          | Participants | Asthma diagnosis | %    | Participants | Asthma diagnosis | %    | Participants | Asthma diagnosis | %    |
| <b>High</b>             |                         |                          |              |                  |      |              |                  |      |              |                  |      |
|                         | Chile                   | South Santiago           | ..           | ..               | ..   | 2750         | 317              | 11.5 | ..           | ..               | ..   |
|                         | Greece                  | Athens                   | ..           | ..               | ..   | 1934         | 151              | 7.8  | 1897         | 144              | 7.6  |
|                         | New Zealand             | Auckland                 | 1538         | 277              | 18.0 | 1885         | 382              | 20.3 | 3002         | 511              | 17.0 |
|                         | Poland                  | Katowice                 | ..           | ..               | ..   | 3185         | 282              | 8.9  | 2220         | 100              | 4.5  |
|                         | Kingdom of Saudi Arabia | Kingdom of Saudi Arabia  | 3614         | 424              | 11.7 | 4086         | 471              | 11.5 | 6786         | 753              | 11.1 |
|                         | Spain                   | A Coruña                 | 3407         | 278              | 8.2  | 3462         | 594              | 17.2 | ..           | ..               | ..   |
|                         | Spain                   | Bilbao                   | 2707         | 568              | 21.0 | 3379         | 905              | 26.8 | ..           | ..               | ..   |
|                         | Spain                   | Cantabria                | 2841         | 428              | 15.1 | 4382         | 898              | 20.5 | ..           | ..               | ..   |
|                         | Spain                   | Cartagena                | 3509         | 296              | 8.4  | 3437         | 399              | 11.6 | 6961         | 715              | 10.3 |
|                         | Spain                   | Salamanca                | 2388         | 166              | 7.0  | 3485         | 488              | 14.0 | ..           | ..               | ..   |
|                         | Taiwan                  | Taipei                   | 3036         | 426              | 14.0 | 3474         | 417              | 12.0 | 9690         | 501              | 5.2  |
| <b>Upper-middle</b>     |                         |                          |              |                  |      |              |                  |      |              |                  |      |
|                         | Argentina               | San Francisco            | ..           | ..               | ..   | 1012         | 107              | 11.0 | ..           | ..               | ..   |
|                         | Brazil                  | Uruguiana                | ..           | ..               | ..   | 1058         | 165              | 15.6 | 896          | 91               | 10.2 |
|                         | Costa Rica              | Costa Rica               | 1936         | 397              | 20.5 | 1338         | 243              | 18.2 | 3272         | 560              | 17.1 |
|                         | Ecuador                 | Quito                    | ..           | ..               | ..   | 3000         | 100              | 3.3  | ..           | ..               | ..   |
|                         | Iran                    | Karaj                    | 572          | 52               | 9.1  | 754          | 49               | 6.5  | 1175         | 38               | 3.2  |
|                         | Iran                    | Yazd                     | 2526         | 73               | 2.9  | 5141         | 251              | 4.9  | 4773         | 102              | 2.1  |
|                         | Kosovo                  | Ferizaj                  | ..           | ..               | ..   | 890          | 6                | 0.7  | 1372         | 6                | 0.4  |
|                         | Kosovo                  | Gjakova                  | ..           | ..               | ..   | 676          | 11               | 1.6  | 1352         | 12               | 0.9  |
|                         | Kosovo                  | Gjilan                   | ..           | ..               | ..   | 1200         | 25               | 2.1  | 1835         | 13               | 0.7  |
|                         | Kosovo                  | Peja                     | 1441         | 22               | 1.5  | 1433         | 51               | 3.6  | 1816         | 23               | 1.3  |
|                         | Kosovo                  | Pristhina                | ..           | ..               | ..   | 1056         | 18               | 1.7  | 2006         | 15               | 0.7  |
|                         | Kosovo                  | Prizren                  | ..           | ..               | ..   | 1427         | 19               | 1.3  | 2712         | 29               | 1.1  |
|                         | Mexico                  | Aguascalientes           | 3176         | 280              | 8.8  | 3336         | 266              | 8.0  | 2907         | 123              | 4.2  |
|                         | Mexico                  | Chihuahua                | 1969         | 153              | 7.8  | 2180         | 219              | 10.0 | ..           | ..               | ..   |
|                         | Mexico                  | Ciudad Juarez            | 2118         | 83               | 3.9  | 2443         | 136              | 5.6  | 2611         | 91               | 3.5  |
|                         | Mexico                  | Ciudad Victoria          | 2444         | 150              | 6.1  | 2468         | 162              | 6.6  | 6239         | 223              | 3.6  |
|                         | Mexico                  | Cordoba                  | 2746         | 155              | 5.6  | 2991         | 276              | 9.2  | 2839         | 95               | 3.3  |
|                         | Mexico                  | Matamoros                | 806          | 44               | 5.5  | 2892         | 219              | 7.6  | 1316         | 41               | 3.1  |
|                         | Mexico                  | Mexicali                 | 2001         | 137              | 6.8  | 2479         | 162              | 6.5  | 2436         | 124              | 5.1  |
|                         | Mexico                  | Mexico City (North Area) | 2515         | 102              | 4.1  | 3375         | 183              | 5.4  | 5231         | 188              | 3.6  |
|                         | Mexico                  | Michoacan                | 2166         | 68               | 3.1  | 2504         | 106              | 4.2  | 2232         | 72               | 3.2  |
|                         | Mexico                  | Monterrey                | ..           | ..               | ..   | 2641         | 239              | 9.0  | 2118         | 146              | 6.9  |
|                         | Mexico                  | Oaxaca                   | 1329         | 36               | 2.7  | 2569         | 137              | 5.3  | ..           | ..               | ..   |
|                         | Mexico                  | Puerto Vallarta          | 2241         | 157              | 7.0  | 2439         | 188              | 7.7  | ..           | ..               | ..   |
|                         | Mexico                  | San Luis Potosi          | 2108         | 102              | 4.8  | 2580         | 194              | 7.5  | 2835         | 91               | 3.2  |
|                         | Mexico                  | Tijuana                  | 2082         | 90               | 4.3  | 2601         | 135              | 5.2  | 1397         | 63               | 4.5  |
|                         | Mexico                  | Toluca Rural             | 2976         | 54               | 1.8  | 3122         | 96               | 3.1  | 7587         | 105              | 1.4  |
|                         | Mexico                  | Toluca Urban Area        | 2712         | 69               | 2.5  | 2650         | 110              | 4.2  | 6162         | 109              | 1.8  |
|                         | Mexico                  | Xalapa                   | 3717         | 181              | 4.9  | 3339         | 240              | 7.2  | ..           | ..               | ..   |
|                         | Russia                  | Tyumen                   | 2969         | 125              | 4.2  | 3007         | 155              | 5.2  | 2360         | 34               | 1.4  |
|                         | South Africa            | Cape Town                | ..           | ..               | ..   | 3979         | 491              | 12.3 | ..           | ..               | ..   |
|                         | South Africa            | Durban                   | ..           | ..               | ..   | 1960         | 234              | 11.9 | ..           | ..               | ..   |
|                         | Thailand                | Bangkok                  | 3067         | 169              | 5.5  | 3206         | 207              | 6.5  | 5418         | 181              | 3.3  |

**Lower-middle and Low**

|                      |                 |                |              |            |                |               |            |                |              |            |
|----------------------|-----------------|----------------|--------------|------------|----------------|---------------|------------|----------------|--------------|------------|
| Cameroon             | Yaounde         | 722            | 10           | 1.4        | 1066           | 34            | 3.2        | 860            | 17           | 2.0        |
| Honduras             | Tegucigalpa     | 361            | 36           | 10.0       | 1431           | 218           | 15.2       | 254            | 48           | 18.9       |
| India                | Bikaner         | 2600           | 7            | 0.3        | 2702           | 95            | 3.5        | 10495          | 41           | 0.4        |
| India                | Chandigarh      | 2473           | 24           | 1.0        | 3000           | 27            | 0.9        | 10386          | 106          | 1.0        |
| India                | Jaipur          | 2296           | 36           | 1.6        | 3060           | 95            | 3.1        | 8933           | 279          | 3.1        |
| India                | Kolkata         | ..             | ..           | ..         | 2998           | 162           | 5.4        | 7823           | 171          | 2.2        |
| India                | Kottayam        | 2099           | 58           | 2.8        | 2091           | 67            | 3.2        | 6940           | 202          | 2.9        |
| India                | Lucknow         | 2969           | 13           | 0.4        | 2969           | 29            | 1.0        | 11820          | 62           | 0.5        |
| India                | Mysuru (Mysore) | 2730           | 37           | 1.4        | 3051           | 54            | 1.8        | 11178          | 144          | 1.3        |
| India                | New Delhi (7)   | 2516           | 11           | 0.4        | 3024           | 2             | 0.07       | 9449           | 168          | 1.8        |
| India                | Pune            | 2404           | 40           | 1.7        | 3030           | 71            | 2.3        | 8000           | 99           | 1.2        |
| Nicaragua            | Managua         | 3162           | 347          | 11.0       | 3131           | 426           | 13.6       | ..             | ..           | ..         |
| Nigeria              | Ibadan          | ..             | ..           | ..         | 2897           | 59            | 2.0        | 2321           | 41           | 1.8        |
| Sri Lanka            | Anuradhapura    | 2180           | 91           | 4.2        | 2989           | 243           | 8.1        | ..             | ..           | ..         |
| Sri Lanka            | Peradeniya      | 1492           | 72           | 4.8        | 1696           | 176           | 10.4       | ..             | ..           | ..         |
| Sudan                | Gadarif         | ..             | ..           | ..         | 1344           | 32            | 2.4        | ..             | ..           | ..         |
| Sudan                | Khartoum        | ..             | ..           | ..         | 1785           | 39            | 2.2        | ..             | ..           | ..         |
| Syrian Arab Republic | Damascus        | ..             | ..           | ..         | 1100           | 107           | 9.7        | ..             | ..           | ..         |
| Syrian Arab Republic | Lattakia        | 1116           | 101          | 9.1        | 1215           | 92            | 7.6        | ..             | ..           | ..         |
| <b>TOTAL</b>         |                 | <b>101,777</b> | <b>6,445</b> | <b>6.3</b> | <b>157,784</b> | <b>12,532</b> | <b>7.9</b> | <b>193,912</b> | <b>6,677</b> | <b>3.4</b> |

\* See text for definition

**Web table 2. Proportion (and 95% confidence interval clustered by centre) of children receiving inhaled and oral asthma medicines and having a management plan according to the severity of symptoms stratified by country income category\*.**

|                     | High income countries |                     |                     | Upper-middle income countries |                     |                     | Lower-middle and low income countries |                     |                     |
|---------------------|-----------------------|---------------------|---------------------|-------------------------------|---------------------|---------------------|---------------------------------------|---------------------|---------------------|
|                     | Asymptomatic          | Mild symptoms       | Severe symptoms     | Asymptomatic                  | Mild symptoms       | Severe symptoms     | Asymptomatic                          | Mild symptoms       | Severe symptoms     |
| <b>Inhaled</b>      |                       |                     |                     |                               |                     |                     |                                       |                     |                     |
| <b>SABA</b>         | 30.6<br>(23.4-38.8)   | 68.8<br>(40.1-87.9) | 81.2<br>(65.8-90.7) | 34.0<br>(27.3-41.4)           | 75.2<br>(69.7-80.0) | 85.3<br>(81.1-88.7) | 29.3<br>(25.9-32.9)                   | 46.4<br>(39.6-53.3) | 55.5<br>(50.3-60.5) |
| <b>LABA</b>         | 1.2<br>(0.5-2.6)      | 4.0<br>(2.4-6.8)    | 4.6<br>(1.8-11.4)   | 1.1<br>(0.3-3.9)              | 3.0<br>(1.0-8.8)    | 2.8<br>(1.0-7.8)    | 4.2<br>(2.6-6.7)                      | 8.8<br>(3.8-18.9)   | 9.5<br>(4.5-19.0)   |
| <b>ICS</b>          | 19.6<br>(13.7-27.1)   | 40.0<br>(25.5-56.4) | 51.9<br>(42.7-60.9) | 15.2<br>(12.1-18.9)           | 38.1<br>(33.0-43.4) | 46.6<br>(40.0-53.4) | 12.6<br>(9.8-16.0)                    | 23.7<br>(15.6-34.4) | 23.0<br>(18.4-28.2) |
| <b>ICS-LABA</b>     | 8.4<br>(4.8-14.3)     | 19.0<br>(12.3-28.2) | 27.7<br>(18.6-39.1) | 9.0<br>(6.6-12.1)             | 21.2<br>(16.6-26.8) | 22.8<br>(19.2-26.9) | 7.4<br>(4.3-12.3)                     | 14.4<br>(7.0-27.5)  | 18.0<br>(13.3-24.0) |
| <b>Any</b>          | 36.4<br>(30.9-42.3)   | 73.7<br>(51.1-88.3) | 87.6<br>(74.8-94.4) | 41.4<br>(34.0-49.3)           | 83.2<br>(78.3-87.1) | 89.7<br>(83.0-93.9) | 38.9<br>(35.0-43.0)                   | 61.9<br>(54.5-68.7) | 75.6<br>(71.7-79.1) |
| <b>Oral</b>         |                       |                     |                     |                               |                     |                     |                                       |                     |                     |
| <b>LTRA</b>         | 8.0<br>(2.9-20.0)     | 18.0<br>(8.3-34.8)  | 24.1<br>(11.2-44.4) | 13.8<br>(8.7-21.3)            | 31.7<br>(17.7-50.0) | 32.6<br>(17.5-52.5) | 8.4<br>(3.5-18.7)                     | 17.0<br>(9.1-29.5)  | 23.0<br>(12.4-38.7) |
| <b>OCS</b>          | 6.6<br>(2.9-14.0)     | 24.3<br>(17.2-33.1) | 38.6<br>(20.6-60.4) | 9.9<br>(6.2-15.5)             | 20.7<br>(11.9-33.6) | 29.6<br>(16.3-47.7) | 18.5<br>(7.7-38.2)                    | 26.8<br>(11.9-49.7) | 30.7<br>(12.9-57.0) |
| <b>SABA</b>         | 11.2<br>(5.2-22.5)    | 25.2<br>(19.2-32.3) | 34.6<br>(28.5-41.3) | 16.3<br>(11.7-22.2)           | 32.4<br>(19.9-48.2) | 41.4<br>(24.5-60.5) | 9.4<br>(5.7-15.1)                     | 23.7<br>(14.9-35.5) | 28.3<br>(15.7-45.6) |
| <b>Theophylline</b> | 1.9<br>(0.3-12.8)     | 3.8<br>(1.2-10.8)   | 4.8<br>(1.1-18.6)   | 2.7<br>(1.2-6.0)              | 4.1<br>(2.7-6.1)    | 4.1<br>(2.6-6.4)    | 10.3<br>(5.5-18.7)                    | 18.6<br>(12.0-27.6) | 19.8<br>(9.4-37.0)  |
| <b>Any</b>          | 19.7<br>(12.1-30.5)   | 44.4<br>(38.4-50.5) | 61.5<br>(55.0-67.7) | 31.9<br>(25.9-38.6)           | 64.4<br>(53.1-74.4) | 72.5<br>(58.1-83.3) | 39.7<br>(32.7-47.0)                   | 55.2<br>(50.0-60.2) | 66.4<br>(58.4-73.6) |
| <b>Asthma plan</b>  | 52.3<br>(36.3-67.8)   | 58.3<br>(38.8-75.5) | 70.5<br>(54.6-82.6) | 64.4<br>(53.1-74.3)           | 69.7<br>(57.8-79.5) | 72.3<br>(56.3-84.1) | 52.7<br>(42.3-62.8)                   | 57.7<br>(50.3-64.8) | 69.6<br>(61.9-76.3) |

\*See text for definitions.

SABA: Short-acting beta2 agonist; LABA: Inhaled long-acting beta2 agonists; ICS: Inhaled corticosteroids; ICS-LABA: combinations of inhaled corticosteroids and long acting beta2 agonists; LTRA: Leukotriene receptor antagonists; OCS: Oral corticosteroids.

**Web table 3. Proportion (and 95% confidence interval clustered by centre) of adolescents receiving inhaled and oral asthma medicines and having a management plan according to the severity of symptoms stratified by country income category\*.**

|                     | High income countries |                     |                     | Upper-middle income countries |                     |                     | Lower-middle and low income countries |                     |                     |
|---------------------|-----------------------|---------------------|---------------------|-------------------------------|---------------------|---------------------|---------------------------------------|---------------------|---------------------|
|                     | Asymptomatic          | Mild symptoms       | Severe symptoms     | Asymptomatic                  | Mild symptoms       | Severe symptoms     | Asymptomatic                          | Mild symptoms       | Severe symptoms     |
| <b>Inhaled</b>      |                       |                     |                     |                               |                     |                     |                                       |                     |                     |
| <b>SABA</b>         | 35.5<br>(27.4-44.5)   | 66.7<br>(52.0-78.7) | 78.8<br>(66.3-87.6) | 22.0<br>(18.6-25.7)           | 48.0<br>(44.2-51.8) | 61.8<br>(57.0-66.4) | 20.3<br>(13.9-28.5)                   | 38.7<br>(29.8-48.4) | 64.5<br>(53.0-74.5) |
| <b>LABA</b>         | 9.3<br>(6.0-14.2)     | 12.7<br>(8.2-19.1)  | 21.5<br>(14.8-30.2) | 8.0<br>(5.5-11.5)             | 11.7<br>(7.3-18.3)  | 19.8<br>(12.0-30.8) | 6.7<br>(4.3-10.1)                     | 9.2<br>(5.0-16.5)   | 33.6<br>(21.0-49.0) |
| <b>ICS</b>          | 14.3<br>(9.9-20.2)    | 24.2<br>(18.5-31.0) | 36.6<br>(28.5-45.5) | 9.1<br>(6.3-13.0)             | 17.5<br>(11.4-21.7) | 28.4<br>(21.6-36.4) | 9.3<br>(5.6-15.1)                     | 15.3<br>(13.1-17.8) | 37.2<br>(28.7-46.5) |
| <b>ICS-LABA</b>     | 12.8<br>(9.0-17.8)    | 23.5<br>(17.2-31.2) | 34.6<br>(29.4-40.2) | 7.9<br>(5.7-10.9)             | 15.2<br>(12.1-18.9) | 21.2<br>(15.3-28.7) | 7.5<br>(6.3-9.0)                      | 10.7<br>(7.1-15.7)  | 34.5<br>(21.7-50.0) |
| <b>Any</b>          | 38.7<br>(30.8-47.3)   | 76.1<br>(67.3-83.1) | 86.7<br>(79.5-91.6) | 33.3<br>(31.1-35.6)           | 62.9<br>(57.4-68.1) | 78.0<br>(74.2-81.4) | 35.4<br>(29.0-42.3)                   | 62.4<br>(56.6-67.9) | 82.0<br>(70.7-89.7) |
| <b>Oral</b>         |                       |                     |                     |                               |                     |                     |                                       |                     |                     |
| <b>LTRA</b>         | 8.2<br>(4.9-13.6)     | 11.8<br>(7.2-18.8)  | 18.3<br>(11.4-28.0) | 6.9<br>(3.7-12.5)             | 17.1<br>(10.4-26.8) | 24.1<br>(16.4-33.9) | 7.6<br>(3.1-17.7)                     | 9.0<br>(4.2-18.2)   | 10.5<br>(7.4-14.7)  |
| <b>OCS</b>          | 5.5<br>(3.6-8.4)      | 8.1<br>(5.3-12.0)   | 18.8<br>(12.9-26.6) | 5.5<br>(3.2-9.4)              | 8.0<br>(5.3-11.9)   | 21.2<br>(14.9-29.2) | 7.3<br>(3.1-16.4)                     | 7.5<br>(4.1-13.4)   | 13.4<br>(10.2-17.4) |
| <b>SABA</b>         | 12.0<br>(8.3-17.0)    | 23.5<br>(15.3-34.4) | 37.1<br>(27.8-47.4) | 8.9<br>(5.3-14.5)             | 17.6<br>(11.2-26.7) | 32.4<br>(22.9-43.6) | 6.2<br>(2.6-14.0)                     | 16.8<br>(10.7-25.2) | 16.9<br>(6.1-38.5)  |
| <b>Theophylline</b> | 4.5<br>(2.7-7.4)      | 4.4<br>(2.8-6.9)    | 10.9<br>(6.9-16.6)  | 4.2<br>(1.8-9.7)              | 5.6<br>(2.4-12.4)   | 10.8<br>(5.0-21.7)  | 4.4<br>(1.5-12.4)                     | 9.2<br>(4.6-17.7)   | 8.4<br>(1.5-12.7)   |
| <b>Any</b>          | 16.0<br>(10.8-23.0)   | 29.5<br>(20.9-40.0) | 47.7<br>(37.6-57.9) | 20.5<br>(18.6-23.4)           | 42.7<br>(36.5-49.1) | 64.0<br>(59.5-68.4) | 32.7<br>(26.2-39.9)                   | 50.6<br>(40.8-60.3) | 68.6<br>(59.0-76.9) |
| <b>Asthma plan</b>  | 39.8<br>(31.6-48.8)   | 50.2<br>(35.9-64.4) | 58.8<br>(49.0-67.9) | 56.6<br>(52.9-60.2)           | 55.9<br>(47.5-64.0) | 67.1<br>(62.1-71.8) | 53.9<br>(48.2-59.4)                   | 53.8<br>(47.8-59.6) | 63.7<br>(47.2-77.5) |

\*See text for definitions.

SABA: Short-acting beta2 agonist; LABA: inhaled long-acting beta2 agonists; ICS: Inhaled corticosteroids; ICS-LABA: combinations of inhaled corticosteroids and long acting beta2 agonists; LTRA: Leukotriene receptor antagonists; OCS: Oral corticosteroids.

**Web table 4. Proportion (and 95% confidence interval clustered by centre) of adults receiving inhaled and oral asthma medicines and having a management plan according to the severity of symptoms stratified by country income category\*.**

|                     | High income countries |                     |                     | Upper-middle income countries |                     |                     | Lower-middle and low income countries |                     |                     |
|---------------------|-----------------------|---------------------|---------------------|-------------------------------|---------------------|---------------------|---------------------------------------|---------------------|---------------------|
|                     | Asymptomatic          | Mild symptoms       | Severe symptoms     | Asymptomatic                  | Mild symptoms       | Severe symptoms     | Asymptomatic                          | Mild symptoms       | Severe symptoms     |
| <b>Inhaled</b>      |                       |                     |                     |                               |                     |                     |                                       |                     |                     |
| <b>SABA</b>         | 22.2<br>(9.4-44.1)    | 57.8<br>(47.2-67.7) | 74.2<br>(70.2-77.7) | 24.1<br>(19.4-29.6)           | 66.4<br>(56.4-75.1) | 77.4<br>(68.8-84.2) | 18.1<br>(8.8-33.5)                    | 39.5<br>(29.7-50.2) | 57.4<br>(41.2-72.2) |
| <b>LABA</b>         | 2.8<br>(0.5-14.1)     | 7.8<br>(0.9-44.8)   | 12.6<br>(1.1-64.6)  | 4.3<br>(2.6-7.1)              | 23.2<br>(8.9-48.5)  | 24.5<br>(9.4-50.4)  | 7.9<br>(3.9-15.5)                     | 8.3<br>(4.8-14.1)   | 14.3<br>(8.7-22.5)  |
| <b>ICS</b>          | 9.5<br>(2.4-31.2)     | 27.9<br>(18.9-39.1) | 36.2<br>(15.7-63.4) | 4.7<br>(2.7-8.0)              | 12.7<br>(7.4-20.9)  | 30.0<br>(20.6-41.5) | 8.3<br>(3.8-16.9)                     | 10.1<br>(6.8-14.9)  | 17.1<br>(11.3-25.2) |
| <b>ICS-LABA</b>     | 10.7<br>(2.0-40.9)    | 29.4<br>(17.7-44.5) | 44.7<br>(28.6-62.1) | 4.8<br>(3.4-6.7)              | 14.3<br>(11.4-17.9) | 23.7<br>(18.2-30.4) | 12.3<br>(5.8-24.3)                    | 23.6<br>(16.1-33.1) | 31.2<br>(24.6-38.7) |
| <b>Any</b>          | 24.8<br>(8.2-54.7)    | 64.8<br>(48.6-78.3) | 84.1<br>(74.5-90.5) | 30.7<br>(25.4-36.5)           | 74.2<br>(68.9-78.9) | 87.6<br>(82.5-91.4) | 28.8<br>(12.8-52.6)                   | 67.0<br>(53.8-78.0) | 81.6<br>(71.7-88.6) |
| <b>Oral</b>         |                       |                     |                     |                               |                     |                     |                                       |                     |                     |
| <b>LTRA</b>         | 5.0<br>(0.2-54.3)     | 6.8<br>(0.9-36.6)   | 12.6<br>(1.1-66.2)  | 4.3<br>(1.8-10.2)             | 8.3<br>(2.5-24.6)   | 20.4<br>(9.8-37.8)  | 1.6<br>(0.3-7.7)                      | 1.4<br>(0.2-8.4)    | 5.0<br>(1.0-22.0)   |
| <b>OCS</b>          | 4.2<br>(0.1-66.4)     | 9.2<br>(1.7-36.3)   | 18.0<br>(2.3-66.7)  | 4.5<br>(2.1-9.5)              | 7.3<br>(2.1-22.4)   | 24.6<br>(11.5-45.0) | 1.9<br>(0.5-7.5)                      | 1.8<br>(0.4-7.4)    | 6.2<br>(2.7-13.6)   |
| <b>SABA</b>         | 7.2<br>(0.2-72.6)     | 18.8<br>(4.9-50.9)  | 29.1<br>(5.3-75.0)  | 7.6<br>(4.2-13.5)             | 11.6<br>(4.4-27.4)  | 33.7<br>(17.2-55.4) | 4.7<br>(1.0-19.0)                     | 10.5<br>(3.2-29.3)  | 14.5<br>(2.8-49.7)  |
| <b>Theophylline</b> | 3.3<br>(0.04-73.2)    | 5.9<br>(0.3-55.6)   | 10.7<br>(0.4-78.7)  | 1.7<br>(0.7-3.7)              | 4.9<br>(1.7-13.0)   | 8.3<br>(3.9-16.8)   | 0.2<br>(0.01-2.0)                     | 1.8<br>(0.3-11.3)   | 4.8<br>(1.3-16.4)   |
| <b>Any</b>          | 12.5<br>(1.2-63.8)    | 33.5<br>(20.2-50.1) | 50.4<br>(20.6-79.9) | 14.7<br>(9.6-21.7)            | 35.4<br>(22.3-51.1) | 65.3<br>(54.4-74.8) | 21.5<br>(10.6-38.9)                   | 45.3<br>(36.2-54.7) | 57.2<br>(40.7-72.3) |
| <b>Asthma plan</b>  | 32.6<br>(21.4-46.3)   | 39.9<br>(35.4-44.5) | 50.6<br>(47.8-53.3) | 48.0<br>(33.9-62.4)           | 50.1<br>(36.1-64.1) | 69.3<br>(60.3-77.1) | 35.1<br>(16.2-60.2)                   | 46.4<br>(30.8-62.7) | 66.7<br>(50.4-79.8) |

\*See text for definitions.

SABA: Short-acting beta2 agonist; LABA: Inhaled long-acting beta2 agonists; ICS: Inhaled corticosteroids; ICS-LABA: combinations of inhaled corticosteroids and long acting beta2 agonists; LTRA: Leukotriene receptor antagonists; OCS: Oral corticosteroids.



**Web table 5. Proportion (and 95% confidence interval clustered by centre) of children receiving inhaled medicines (and their regimens) according to the severity of symptoms stratified by country income category\*.**

|                 |                      | High income countries |                     |                     | Upper-middle income countries |                     |                     | Lower-middle and low income countries |                     |                     |
|-----------------|----------------------|-----------------------|---------------------|---------------------|-------------------------------|---------------------|---------------------|---------------------------------------|---------------------|---------------------|
|                 |                      | Asymptomatic          | Mild symptoms       | Severe symptoms     | Asymptomatic                  | Mild symptoms       | Severe symptoms     | Asymptomatic                          | Mild symptoms       | Severe symptoms     |
| <b>SABA</b>     | <b>No</b>            | 69.4<br>(61.2-76.6)   | 31.2<br>(12.1-60.0) | 18.8<br>(9.3-34.2)  | 66.0<br>(58.6-72.7)           | 24.8<br>(20.0-30.3) | 14.7<br>(11.3-18.9) | 70.7<br>(67.1-74.1)                   | 53.6<br>(46.7-60.4) | 44.5<br>(39.5-49.7) |
|                 | <b>As needed</b>     | 25.7<br>(20.8-31.2)   | 55.0<br>(37.2-71.6) | 55.7<br>(47.3-63.8) | 29.7<br>(23.8-36.3)           | 63.7<br>(56.1-70.6) | 69.1<br>(61.3-75.8) | 22.7<br>(19.8-25.8)                   | 34.0<br>(27.9-40.7) | 39.2<br>(35.5-43.1) |
|                 | <b>Short courses</b> | 3.6<br>(1.9-6.8)      | 11.8<br>(5.4-23.9)  | 16.7<br>(11.2-24.1) | 3.6<br>(2.4-5.3)              | 8.3<br>(5.5-12.2)   | 8.7<br>(6.4-11.7)   | 5.7<br>(4.8-6.6)                      | 10.3<br>(6.6-15.7)  | 9.9<br>(8.2-11.9)   |
|                 | <b>Every day</b>     | 1.3<br>(0.6-2.7)      | 2.0<br>(1.0-4.5)    | 8.8<br>(5.8-13.1)   | 0.8<br>(0.3-1.7)              | 3.3<br>(1.8-5.8)    | 7.5<br>(5.3-10.6)   | 1.0<br>(0.5-1.9)                      | 2.1<br>(0.6-6.6)    | 6.4<br>(3.7-10.7)   |
| <b>LABA</b>     | <b>No</b>            | 98.8<br>(97.4-99.5)   | 96.0<br>(93.2-97.6) | 95.4<br>(88.6-98.2) | 98.9<br>(96.1-99.7)           | 97.0<br>(91.2-99.0) | 97.2<br>(92.2-99.0) | 95.8<br>(93.3-97.4)                   | 91.2<br>(81.1-96.2) | 90.5<br>(81.0-95.5) |
|                 | <b>As needed</b>     | 0.8<br>(0.3-2.1)      | 3.2<br>(1.9-5.4)    | 2.8<br>(1.1-7.2)    | 0.6<br>(0.2-2.4)              | 1.9<br>(0.5-6.3)    | 1.2<br>(0.3-5.7)    | 3.4<br>(2.1-5.6)                      | 4.6<br>(2.4-8.8)    | 4.9<br>(1.2-18.5)   |
|                 | <b>Short courses</b> | 0.2<br>(0.05-0.8)     | 0.4<br>(0.1-1.2)    | 1.0<br>(0.4-2.8)    | 0.2<br>(0.06-0.8)             | 0.9<br>(0.4-2.4)    | 1.2<br>(0.5-2.9)    | 0.7<br>(0.3-1.8)                      | 3.6<br>(1.1-10.9)   | 3.2<br>(1.6-6.2)    |
|                 | <b>Every day</b>     | 0.1<br>(0.03-0.6)     | 0.4<br>(0.1-1.1)    | 0.7<br>(0.3-2.0)    | 0.2<br>(0.03-1.4)             | 0.2<br>(0.03-0.9)   | 0.4<br>(0.1-1.0)    | ..                                    | 0.5<br>(0.04-6.2)   | 1.4<br>(0.6-3.2)    |
| <b>ICS</b>      | <b>No</b>            | 80.4<br>(72.9-86.3)   | 60.1<br>(43.6-74.5) | 48.1<br>(39.1-57.3) | 84.8<br>(81.1-87.9)           | 61.9<br>(56.6-67.0) | 53.4<br>(46.6-60.0) | 87.4<br>(84.0-90.2)                   | 76.3<br>(65.6-84.4) | 77.0<br>(71.7-81.6) |
|                 | <b>As needed</b>     | 6.9<br>(3.6-12.8)     | 12.9<br>(8.7-18.6)  | 17.7<br>(11.1-27.1) | 10.7<br>(7.6-14.9)            | 21.7<br>(16.3-28.3) | 28.6<br>(19.8-39.5) | 8.6<br>(6.5-11.3)                     | 13.9<br>(6.6-27.0)  | 8.8<br>(6.4-12.1)   |
|                 | <b>Short courses</b> | 3.9<br>(2.6-5.9)      | 11.3<br>(7.2-17.2)  | 13.6<br>(8.7-20.5)  | 1.9<br>(1.1-3.5)              | 6.6<br>(7.0-13.7)   | 4.8<br>(2.7-8.4)    | 2.2<br>(0.8-6.2)                      | 5.7<br>(3.9-8.1)    | 6.7<br>(2.9-14.7)   |
|                 | <b>Every day</b>     | 8.7<br>(3.1-22.4)     | 15.8<br>(6.7-33.1)  | 20.6<br>(11.4-34.3) | 2.6<br>(1.6-4.1)              | 9.8<br>(7.0-13.7)   | 13.2<br>(9.2-18.5)  | 1.7<br>(1.0-3.1)                      | 4.1<br>(2.5-6.8)    | 7.4<br>(5.7-9.7)    |
| <b>ICS_LABA</b> | <b>No</b>            | 91.6<br>(85.7-95.2)   | 81.0<br>(71.8-87.7) | 72.3<br>(60.9-81.4) | 91.0<br>(87.9-93.4)           | 78.8<br>(73.2-83.4) | 77.2<br>(73.1-80.8) | 92.6<br>(87.7-95.7)                   | 85.6<br>(72.5-93.0) | 82.0<br>(76.0-87.0) |
|                 | <b>As needed</b>     | 4.1<br>(1.6-10.1)     | 7.9<br>(4.2-14.4)   | 11.0<br>(4.9-23.0)  | 5.5<br>(3.7-8.2)              | 10.3<br>(7.4-14.2)  | 12.6<br>(9.7-16.1)  | 5.2<br>(3.1-8.4)                      | 6.2<br>(2.2-15.9)   | 9.2<br>(6.8-12.3)   |
|                 | <b>Short courses</b> | 1.5<br>(0.4-4.8)      | 4.6<br>(2.7-7.7)    | 7.0<br>(4.5-10.8)   | 0.9<br>(0.5-1.6)              | 3.3<br>(2.1-5.1)    | 3.0<br>(1.9-4.8)    | 1.2<br>(0.6-2.5)                      | 4.6<br>(2.3-9.3)    | 3.5<br>(2.5-5.0)    |
|                 | <b>Every day</b>     | 2.9<br>(0.9-8.7)      | 6.6<br>(3.6-11.6)   | 9.7<br>(4.6-19.4)   | 2.6<br>(1.6-4.2)              | 7.6<br>(5.4-10.8)   | 7.3<br>(5.2-10.1)   | 1.0<br>(0.2-3.8)                      | 3.6<br>(1.8-7.1)    | 5.3<br>(2.3-11.7)   |

\*See text for definitions.

SABA: Inhaled short-acting beta2 agonist; LABA: Inhaled long-acting beta2 agonists; ICS: Inhaled corticosteroids; ICS-LABA: combinations of inhaled corticosteroids and long acting beta2 agonists.

Web table 6. Proportion (and 95% confidence interval clustered by centre) of children receiving oral medicines (and their regimens) according to the severity of symptoms stratified by country income category\*.

|              |               | High income countries |                     |                     | Upper-middle income countries |                     |                     | Lower-middle and low income countries |                      |                     |
|--------------|---------------|-----------------------|---------------------|---------------------|-------------------------------|---------------------|---------------------|---------------------------------------|----------------------|---------------------|
|              |               | Asymptomatic          | Mild symptoms       | Severe symptoms     | Asymptomatic                  | Mild symptoms       | Severe symptoms     | Asymptomatic                          | Mild symptoms        | Severe symptoms     |
| LTRA         | No            | 92.0<br>(80.0-97.1)   | 82.0<br>(65.2-91.7) | 75.9<br>(55.6-88.8) | 86.2<br>(78.7-91.3)           | 68.3<br>(50.0-82.3) | 67.4<br>(47.5-82.5) | 91.6<br>(81.3-96.5)                   | 83.0<br>(70.5-90.9)  | 77.0<br>(61.3-87.6) |
|              | As needed     | 2.4<br>(0.9-6.5)      | 3.8<br>(1.7-7.9)    | 6.1<br>(2.7-13.0)   | 6.4<br>(4.0-10.1)             | 13.4<br>(7.6-22.6)  | 12.2<br>(6.8-21.0)  | 5.2<br>(2.3-11.2)                     | 6.7<br>(4.1-10.7)    | 11.0<br>(7.3-16.2)  |
|              | Short courses | 2.6<br>(0.5-12.1)     | 6.7<br>(2.7-15.6)   | 5.1<br>(1.6-14.8)   | 1.3<br>(0.5-3.6)              | 3.9<br>(1.1-13.3)   | 3.8<br>(1.5-9.6)    | 3.2<br>(1.2-8.0)                      | 8.2<br>(3.8-16.9)    | 11.0<br>(4.9-22.8)  |
|              | Every day     | 2.9<br>(1.1-7.3)      | 7.5<br>(3.7-14.8)   | 13.0<br>(6.3-24.9)  | 6.1<br>(3.7-10.0)             | 14.4<br>(7.0-27.2)  | 16.6<br>(8.2-30.8)  | ..                                    | 2.1<br>(0.9-4.8)     | 1.1<br>(0.4-3.1)    |
| SABA         | No            | 88.8<br>(77.5-94.8)   | 74.8<br>(67.7-80.8) | 65.4<br>(58.7-71.5) | 83.7<br>(77.8-88.3)           | 67.6<br>(51.8-80.1) | 58.6<br>(39.5-75.5) | 90.6<br>(84.9-94.3)                   | 76.3<br>(64.5-85.1)  | 71.7<br>(54.4-84.3) |
|              | As needed     | 8.8<br>(73.8-19.1)    | 18.8<br>(12.4-27.4) | 23.7<br>(19.9-27.9) | 14.6<br>(10.4-20.0)           | 27.6<br>(16.8-41.9) | 34.1<br>(20.7-50.7) | 7.9<br>(4.8-12.6)                     | 22.7<br>(14.0-34.6)  | 21.9<br>(12.3-35.9) |
|              | Short courses | 2.1<br>(1.0-4.6)      | 5.9<br>(2.9-11.7)   | 7.9<br>(4.5-13.5)   | 1.4<br>(0.8-2.6)              | 3.9<br>(2.2-6.8)    | 5.4<br>(3.1-9.3)    | 1.5<br>(0.8-2.8)                      | 1.0<br>(0.3-3.8)     | 4.9<br>(1.9-12.1)   |
|              | Every day     | 0.3<br>(0.08-1.0)     | 0.5<br>(0.09-3.2)   | 3.0<br>(1.4-6.4)    | 0.3<br>(0.09-1.1)             | 0.9<br>(0.4-2.1)    | 1.9<br>(0.8-4.0)    | ..                                    | ..                   | 1.4<br>(0.4-4.1)    |
| OCS          | No            | 93.4<br>(86.0-97.1)   | 75.7<br>(66.9-82.8) | 61.4<br>(39.6-79.4) | 90.1<br>(84.5-93.8)           | 79.3<br>(66.4-88.1) | 70.4<br>(52.3-83.7) | 81.5<br>(61.8-92.3)                   | 73.2<br>(50.3-88.1)  | 69.3<br>(43.0-87.1) |
|              | As needed     | 5.3<br>(2.3-11.5)     | 19.7<br>(13.9-27.1) | 29.1<br>(15.8-47.2) | 8.4<br>(5.2-13.4)             | 18.1<br>(10.4-29.6) | 23.3<br>(13.0-38.1) | 13.1<br>(5.5-27.9)                    | 19.6<br>(10.5-33.5)  | 18.4<br>(9.5-32.5)  |
|              | Short courses | 1.2<br>(0.4-3.5)      | 4.4<br>(3.0-6.5)    | 8.8<br>(4.0-18.2)   | 0.8<br>(0.3-1.9)              | 1.7<br>(0.8-3.5)    | 4.2<br>(2.3-7.8)    | 5.2<br>(2.3-11.2)                     | 7.2<br>(2.2-21.2)    | 11.0<br>(4.0-26.8)  |
|              | Every day     | 0.07<br>(0.005-1.0)   | 0.1<br>(0.01-2.0)   | 0.7<br>(0.3-2.2)    | 0.8<br>(0.3-1.9)              | 0.9<br>(0.3-2.7)    | 2.1<br>(1.0-4.2)    | 0.2<br>(0.1-0.6)                      | ..                   | 1.4<br>(0.5-4.1)    |
| Theophylline | No            | 98.1<br>(87.2-99.7)   | 96.2<br>(89.2-98.8) | 95.2<br>(81.4-98.9) | 97.3<br>(94.0-98.8)           | 95.9<br>(93.9-97.3) | 95.9<br>(93.6-97.4) | 89.7<br>(81.3-94.5)                   | 81.4<br>(72.4-88.0)  | 80.2<br>(63.0-90.6) |
|              | As needed     | 1.9<br>(0.3-12.3)     | 3.4<br>(1.1-10.1)   | 3.7<br>(0.8-15.8)   | 1.9<br>(0.9-4.1)              | 3.4<br>(2.1-5.5)    | 3.1<br>(2.2-4.4)    | 7.6<br>(4.5-12.7)                     | 11.9<br>(884.1-16.5) | 12.7<br>(5.9-25.3)  |
|              | Short courses | 0.07<br>(0.008-0.6)   | 0.4<br>(0.1-1.1)    | 1.0<br>(0.3-3.4)    | 0.5<br>(0.1-2.1)              | 0.6<br>(0.3-1.4)    | 0.8<br>(0.3-2.4)    | 2.7<br>(1.1-6.8)                      | 6.7<br>(2.7-15.8)    | 6.7<br>(3.1-13.9)   |
|              | Every day     | ..                    | ..                  | ..                  | 0.2<br>(0.05-0.9)             | ..                  | 0.2<br>(0.04-0.7)   | ..                                    | ..                   | 0.4<br>(0.02-5.8)   |

\*See text for definitions.

LTRA: Leukotriene receptor antagonists; SABA: Oral short acting beta2 agonists; OCS: Oral corticosteroids.

**Web table 7. Proportion (and 95% confidence interval clustered by centre) of adolescents receiving inhaled medicines (and their regimens) according to the severity of symptoms stratified by country income category\*.**

|                 |                      | High income countries |                     |                     | Upper-middle income countries |                     |                     | Lower-middle and low income countries |                     |                     |
|-----------------|----------------------|-----------------------|---------------------|---------------------|-------------------------------|---------------------|---------------------|---------------------------------------|---------------------|---------------------|
|                 |                      | Asymptomatic          | Mild symptoms       | Severe symptoms     | Asymptomatic                  | Mild symptoms       | Severe symptoms     | Asymptomatic                          | Mild symptoms       | Severe symptoms     |
| <b>SABA</b>     | <b>No</b>            | 64.5<br>(55.5-72.6)   | 33.3<br>(21.3-48.0) | 21.2<br>(12.4-33.7) | 78.0<br>(74.3-81.4)           | 52.0<br>(48.2-55.8) | 38.2<br>(33.6-43.0) | 79.7<br>(71.5-86.1)                   | 61.3<br>(51.6-70.2) | 35.5<br>(25.5-47.0) |
|                 | <b>As needed</b>     | 27.1<br>(22.0-33.0)   | 49.0<br>(40.4-57.6) | 44.0<br>(39.6-48.6) | 18.9<br>(16.1-22.1)           | 39.4<br>(35.3-43.5) | 44.6<br>(40.9-48.3) | 15.2<br>(10.5-21.6)                   | 29.5<br>(21.8-38.5) | 41.2<br>(32.5-50.4) |
|                 | <b>Short courses</b> | 4.6<br>(3.1-6.7)      | 9.8<br>(6.8-13.7)   | 17.4<br>(14.0-21.4) | 2.2<br>(1.6-2.9)              | 4.6<br>(3.5-6.2)    | 9.1<br>(7.1-11.5)   | 3.2<br>(2.0-5.1)                      | 6.9<br>(3.9-12.1)   | 17.1<br>(10.1-27.5) |
|                 | <b>Every day</b>     | 3.8<br>(1.8-7.6)      | 8.0<br>(4.2-14.6)   | 17.4<br>(12.3-23.9) | 0.9<br>(0.6-1.4)              | 4.0<br>(3.0-5.3)    | 8.1<br>(6.6-10.0)   | 1.8<br>(0.7-4.7)                      | 2.3<br>(1.7-3.2)    | 6.2<br>(4.9-7.8)    |
| <b>LABA</b>     | <b>No</b>            | 90.7<br>(85.8-94.0)   | 87.3<br>(80.9-91.8) | 78.5<br>(69.8-85.2) | 92.0<br>(88.5-94.5)           | 88.3<br>(81.7-92.7) | 80.2<br>(69.2-88.0) | 93.3<br>(89.9-95.6)                   | 90.8<br>(83.5-95.0) | 66.4<br>(51.0-79.0) |
|                 | <b>As needed</b>     | 7.1<br>(4.3-11.5)     | 10.6<br>(6.7-16.5)  | 16.5<br>(11.4-23.3) | 6.0<br>(4.4-8.2)              | 8.4<br>(5.3-13.0)   | 12.8<br>(8.0-19.9)  | 4.5<br>(2.9-6.8)                      | 4.3<br>(2.9-6.5)    | 18.5<br>(10.3-31.0) |
|                 | <b>Short courses</b> | 1.4<br>(0.8-2.4)      | 1.6<br>(0.9-2.9)    | 3.1<br>(1.8-5.2)    | 1.5<br>(0.8-2.9)              | 1.4<br>(0.6-3.1)    | 4.0<br>(2.2-7.4)    | 1.9<br>(1.1-3.3)                      | 4.3<br>(1.6-11.5)   | 13.0<br>(5.6-27.2)  |
|                 | <b>Every day</b>     | 0.8<br>(0.4-1.6)      | 0.5<br>(0.3-0.8)    | 1.9<br>(1.0-3.6)    | 0.4<br>(0.2-0.8)              | 1.9<br>(0.9-4.0)    | 2.9<br>(1.6-5.1)    | 0.3<br>(0.06-1.5)                     | 0.6<br>(0.3-1.1)    | 2.1<br>(1.4-3.0)    |
| <b>ICS</b>      | <b>No</b>            | 85.7<br>(79.8-90.1)   | 75.8<br>(69.0-81.5) | 63.4<br>(54.5-71.5) | 90.9<br>(87.0-93.7)           | 82.5<br>(78.3-86.0) | 71.6<br>(63.6-78.4) | 90.7<br>(84.9-94.4)                   | 84.7<br>(82.2-86.9) | 62.8<br>(53.5-71.3) |
|                 | <b>As needed</b>     | 10.1<br>(6.3-15.9)    | 15.7<br>(11.5-21.1) | 21.4<br>(14.8-29.9) | 6.7<br>(4.6-9.7)              | 11.5<br>(9.5-13.8)  | 17.7<br>(12.9-23.7) | 4.9<br>(3.0-8.0)                      | 7.8<br>(5.2-11.6)   | 15.1<br>(11.3-19.8) |
|                 | <b>Short courses</b> | 2.4<br>(1.6-3.5)      | 5.2<br>(3.6-7.3)    | 7.7<br>(5.2-11.2)   | 1.6<br>(1.1-2.4)              | 3.5<br>(2.4-5.1)    | 5.2<br>(3.8-7.1)    | 3.0<br>(1.5-5.9)                      | 4.6<br>(2.3-9.0)    | 17.1<br>(8.9-30.4)  |
|                 | <b>Every day</b>     | 1.8<br>(1.0-3.1)      | 3.4<br>(1.7-6.7)    | 7.5<br>(5.3-10.5)   | 0.8<br>(0.4-1.6)              | 2.5<br>(1.4-4.2)    | 5.5<br>(3.9-7.7)    | 1.4<br>(0.4-4.1)                      | 2.9<br>(1.5-5.7)    | 5.0<br>(3.1-8.0)    |
| <b>ICS-LABA</b> | <b>No</b>            | 87.2<br>(82.2-91.0)   | 76.5<br>(68.8-82.8) | 65.4<br>(59.8-70.6) | 92.1<br>(89.1-94.3)           | 84.8<br>(81.1-87.9) | 78.8<br>(71.3-84.7) | 92.5<br>(91.0-93.7)                   | 89.3<br>(84.3-92.9) | 65.5<br>(50.0-78.3) |
|                 | <b>As needed</b>     | 8.7<br>(5.3-14.0)     | 15.1<br>(10.0-22.1) | 18.8<br>(13.2-26.0) | 5.6<br>(3.9-8.1)              | 10.5<br>(8.1-13.6)  | 13.4<br>(9.4-18.7)  | 4.4<br>(3.3-5.8)                      | 4.6<br>(2.4-8.9)    | 19.5<br>(10.7-32.9) |
|                 | <b>Short courses</b> | 1.9<br>(1.3-2.6)      | 3.1<br>(1.8-5.2)    | 6.9<br>(5.5-8.6)    | 1.4<br>(0.9-2.3)              | 2.5<br>(1.3-4.6)    | 4.8<br>(3.4-6.9)    | 2.0<br>(1.0-3.8)                      | 3.5<br>(1.5-7.6)    | 10.2<br>(3.9-24.3)  |
|                 | <b>Every day</b>     | 2.2<br>(1.3-3.6)      | 5.3<br>(3.5-7.7)    | 8.9<br>(6.1-12.8)   | 0.9<br>(0.5-1.4)              | 2.2<br>(1.3-3.5)    | 3.0<br>(2.1-4.4)    | 1.1<br>(0.5-2.4)                      | 2.6<br>(1.1-6.2)    | 4.8<br>(3.3-7.1)    |

\*See text for definitions.

SABA: Inhaled short-acting beta2 agonist; LABA: Inhaled long-acting beta2 agonists; ICS: Inhaled corticosteroids; ICS-LABA: combinations of inhaled corticosteroids and long acting beta2 agonists.

Web table 8. Proportion (and 95% confidence interval clustered by centre) of adolescents receiving oral medicines (and their regimens) according to the severity of symptoms stratified by country income category\*.

|              |               | High income countries |                     |                     | Upper-middle income countries |                     |                     | Lower-middle and low income countries |                     |                     |
|--------------|---------------|-----------------------|---------------------|---------------------|-------------------------------|---------------------|---------------------|---------------------------------------|---------------------|---------------------|
|              |               | Asymptomatic          | Mild symptoms       | Severe symptoms     | Asymptomatic                  | Mild symptoms       | Severe symptoms     | Asymptomatic                          | Mild symptoms       | Severe symptoms     |
| LTRA         | No            | 91.8<br>(86.4-95.1)   | 88.2<br>(81.2-92.8) | 81.7<br>(72.0-88.6) | 93.1<br>(87.5-96.3)           | 82.9<br>(73.2-89.6) | 75.9<br>(66.1-83.6) | 92.4<br>(82.3-96.9)                   | 91.0<br>(81.8-95.8) | 89.5<br>(85.3-92.6) |
|              | As needed     | 5.5<br>(3.2-9.2)      | 6.8<br>(4.4-10.6)   | 9.2<br>(6.1-13.5)   | 4.9<br>(2.5-9.5)              | 8.7<br>(5.4-13.8)   | 13.1<br>(8.3-20.2)  | 4.5<br>(1.8-10.7)                     | 4.9<br>(2.7-8.7)    | 6.6<br>(4.5-9.8)    |
|              | Short courses | 1.1<br>(0.5-2.4)      | 2.3<br>(1.0-5.2)    | 3.3<br>(1.6-6.5)    | 1.0<br>(0.4-2.8)              | 4.9<br>(1.5-15.0)   | 4.6<br>(1.8-11.2)   | 2.8<br>(1.0-7.5)                      | 2.9<br>(0.9-9.2)    | 2.8<br>(1.2-6.0)    |
|              | Every day     | 1.6<br>(1.0-2.7)      | 2.6<br>(1.4-4.8)    | 5.8<br>(3.1-10.5)   | 1.0<br>(0.6-1.6)              | 3.4<br>(1.9-6.3)    | 6.3<br>(4.3-9.1)    | 0.3<br>(0.1-0.8)                      | 1.2<br>(0.5-2.6)    | 1.1<br>(0.6-2.0)    |
| SABA         | No            | 88.0<br>(83.0-91.7)   | 76.5<br>(65.6-84.7) | 62.9<br>(52.6-72.2) | 91.1<br>(85.5-94.7)           | 82.4<br>(73.2-88.8) | 67.6<br>(56.4-77.1) | 93.8<br>(86.0-97.4)                   | 83.2<br>(74.8-89.3) | 83.1<br>(61.5-93.9) |
|              | As needed     | 8.8<br>(0.6-12.8)     | 18.3<br>(11.9-27.0) | 19.9<br>(13.6-28.3) | 7.5<br>(4.8-11.7)             | 14.8<br>(9.3-22.7)  | 24.0<br>(17.1-32.5) | 4.8<br>(18.8-11.7)                    | 13.3<br>(8.8-19.5)  | 13.0<br>(4.9-30.3)  |
|              | Short courses | 2.0<br>(1.3-3.2)      | 2.6<br>(1.6-4.3)    | 10.0<br>(8.0-12.4)  | 1.0<br>(0.4-2.4)              | 1.6<br>(0.8-3.3)    | 4.6<br>(2.8-7.3)    | 1.0<br>(0.6-1.7)                      | 3.2<br>(1.8-5.6)    | 2.3<br>(0.8-6.8)    |
|              | Every day     | 1.1<br>(0.6-2.0)      | 2.6<br>(1.6-4.4)    | 7.1<br>(4.6-10.9)   | 0.4<br>(0.1-1.2)              | 1.2<br>(0.6-2.3)    | 3.8<br>(2.5-5.7)    | 0.3<br>(0.03-3.1)                     | 0.3<br>(0.06-1.4)   | 1.5<br>(0.6-4.1)    |
| OCS          | No            | 94.5<br>(91.6-96.4)   | 91.9<br>(88.0-94.7) | 81.2<br>(73.4-87.1) | 94.5<br>(90.6-96.8)           | 92.0<br>(88.1-94.7) | 78.8<br>(70.8-85.1) | 92.7<br>(83.6-96.9)                   | 92.5<br>(86.6-95.9) | 86.6<br>(82.6-89.8) |
|              | As needed     | 4.2<br>(2.6-6.9)      | 6.5<br>(4.4-9.5)    | 12.9<br>(8.8-18.5)  | 4.3<br>(2.7-7.0)              | 6.8<br>(4.5-10.1)   | 15.7<br>(11.1-21.6) | 5.0<br>(1.9-12.8)                     | 4.9<br>(2.4-9.7)    | 9.3<br>(7.2-11.8)   |
|              | Short courses | 0.8<br>(0.5-1.2)      | 1.4<br>(0.7-2.6)    | 3.8<br>(2.3-6.1)    | 0.9<br>(0.3-2.4)              | 0.9<br>(0.4-1.8)    | 3.4<br>(2.1-5.6)    | 2.1<br>(1.2-3.7)                      | 2.0<br>(1.2-3.5)    | 2.8<br>(1.4-5.2)    |
|              | Every day     | 0.5<br>(0.2-1.3)      | 0.2<br>(0.03-1.4)   | 2.1<br>(1.1-4.1)    | 0.3<br>(0.1-0.7)              | 0.3<br>(0.1-0.9)    | 2.1<br>(1.3-3.5)    | 0.2<br>(0.04-1.0)                     | 0.6<br>(0.1-2.8)    | 1.4<br>(0.6-3.2)    |
| Theophylline | No            | 95.5<br>(92.6-97.3)   | 95.6<br>(93.1-97.2) | 89.1<br>(83.4-93.1) | 95.8<br>(90.3-98.2)           | 94.4<br>(87.6-97.6) | 89.2<br>(78.3-95.0) | 95.6<br>(87.6-98.5)                   | 90.8<br>(82.3-95.4) | 91.6<br>(87.3-94.4) |
|              | As needed     | 3.4<br>(2.0-6.0)      | 3.8<br>(2.4-6.1)    | 8.6<br>(5.4-13.4)   | 3.4<br>(1.6-7.0)              | 4.7<br>(2.1-10.3)   | 8.3<br>(4.2-15.5)   | 2.9<br>(1.0-8.6)                      | 6.6<br>(4.2-10.5)   | 6.5<br>(4.3-9.7)    |
|              | Short courses | 0.7<br>(0.4-1.4)      | 0.3<br>(0.09-0.8)   | 1.7<br>(0.7-3.8)    | 0.5<br>(0.2-1.9)              | 0.8<br>(0.2-2.6)    | 1.8<br>(0.6-5.0)    | 1.3<br>(0.3-4.7)                      | 2.6<br>(0.5-12.0)   | 1.8<br>(1.0-3.3)    |
|              | Every day     | 0.3<br>(0.1-1.1)      | 0.3<br>(0.07-1.2)   | 0.6<br>(0.2-2.3)    | 0.3<br>(0.08-1.2)             | 0.1<br>(0.01-0.9)   | 0.7<br>(0.2-2.3)    | 0.2<br>(0.02-2.1)                     | ..                  | 0.1<br>(0.01-1.5)   |

\*See text for definitions.

LTRA: Leukotriene receptor antagonists; SABA: Oral short acting beta2 agonists; OCS: Oral corticosteroids.

**Web table 9. Proportion (and 95% confidence interval clustered by centre) of adults receiving inhaled medicines (and their regimens) according to severity of symptoms stratified by country income category\*.**

|                 |                      | High income countries |                     |                     | Upper-middle income countries |                     |                     | Lower-middle and low income countries |                     |                     |
|-----------------|----------------------|-----------------------|---------------------|---------------------|-------------------------------|---------------------|---------------------|---------------------------------------|---------------------|---------------------|
|                 |                      | Asymptomatic          | Mild symptoms       | Severe symptoms     | Asymptomatic                  | Mild symptoms       | Severe symptoms     | Asymptomatic                          | Mild symptoms       | Severe symptoms     |
| <b>SABA</b>     | <b>No</b>            | 77.8<br>(55.9-90.6)   | 42.2<br>(32.3-52.8) | 25.8<br>(22.2-29.8) | 75.9<br>(70.4-80.6)           | 33.6<br>(24.9-43.6) | 22.6<br>(15.8-31.2) | 81.9<br>(66.5-91.2)                   | 60.5<br>(49.8-70.3) | 42.6<br>(27.8-58.8) |
|                 | <b>As needed</b>     | 18.8<br>(9.1-34.7)    | 46.1<br>(40.2-52.0) | 51.5<br>(33.8-68.8) | 16.0<br>(11.5-22.0)           | 50.6<br>(45.4-55.8) | 56.7<br>(48.3-64.7) | 13.4<br>(6.1-27.1)                    | 33.0<br>(25.4-41.5) | 44.2<br>(25.6-64.7) |
|                 | <b>Short courses</b> | 2.1<br>(0.2-18.7)     | 7.4<br>(2.3-21.4)   | 11.0<br>(2.9-34.0)  | 6.9<br>(1.7-24.0)             | 14.5<br>(5.8-31.8)  | 8.7<br>(5.6-13.3)   | 1.6<br>(0.6-4.2)                      | 2.9<br>(1.6-5.2)    | 7.0<br>(3.3-14.5)   |
|                 | <b>Every day</b>     | 1.4<br>(1.3-1.5)      | 4.3<br>(1.6-10.7)   | 11.7<br>(9.5-14.2)  | 1.2<br>(0.4-3.6)              | 1.3<br>(0.5-3.0)    | 12.0<br>(7.6-18.5)  | 3.1<br>(0.9-10.1)                     | 3.6<br>(1.3-9.5)    | 6.2<br>(3.9-9.8)    |
| <b>LABA</b>     | <b>No</b>            | 97.2<br>(85.9-99.5)   | 92.2<br>(55.2-99.1) | 87.4<br>(35.4-98.9) | 95.7<br>(92.9-97.4)           | 76.8<br>(51.5-91.1) | 75.5<br>(49.6-90.6) | 92.1<br>(84.5-96.1)                   | 91.7<br>(85.9-95.2) | 85.7<br>(77.5-91.3) |
|                 | <b>As needed</b>     | 2.2<br>(0.4-12.4)     | 5.9<br>(0.6-40.0)   | 8.0<br>(0.7-51.9)   | 3.2<br>(1.6-6.4)              | 17.6<br>(6.8-38.3)  | 15.2<br>(5.9-33.8)  | 5.5<br>(2.4-12.1)                     | 6.5<br>(3.6-11.4)   | 9.1<br>(4.5-17.4)   |
|                 | <b>Short courses</b> | 0.07<br>(0.009-0.5)   | 0.9<br>(0.1-7.7)    | 2.7<br>(0.3-19.9)   | 0.6<br>(0.4-1.1)              | 3.1<br>(1.3-7.3)    | 4.3<br>(1.6-10.9)   | 1.3<br>(0.4-3.9)                      | 1.8<br>(0.6-5.2)    | 4.1<br>(2.6-6.5)    |
|                 | <b>Every day</b>     | 0.5<br>(0.08-3.2)     | 1.0<br>(0.1-9.0)    | 1.9<br>(0.2-13.6)   | 0.5<br>(0.2-1.3)              | 2.5<br>(1.1-5.9)    | 5.0<br>(2.4-10.3)   | 1.1<br>(0.2-6.7)                      | ..                  | 1.0<br>(0.4-2.7)    |
| <b>ICS</b>      | <b>No</b>            | 90.5<br>(68.8-97.6)   | 72.1<br>(60.9-81.1) | 63.8<br>(36.6-84.3) | 95.3<br>(92.0-97.3)           | 87.3<br>(79.1-92.6) | 70.0<br>(58.5-79.4) | 91.7<br>(83.1-96.2)                   | 89.9<br>(85.1-93.2) | 82.9<br>(74.8-88.7) |
|                 | <b>As needed</b>     | 6.4<br>(1.1-30.4)     | 18.3<br>(7.1-39.6)  | 17.5<br>(4.9-46.5)  | 3.5<br>(1.9-6.3)              | 9.4<br>(4.4-19.1)   | 18.5<br>(11.2-29.1) | 5.8<br>(2.3-14.1)                     | 7.2<br>(4.1-12.4)   | 9.9<br>(5.4-17.5)   |
|                 | <b>Short courses</b> | 2.1<br>(0.7-6.1)      | 6.1<br>(3.9-9.2)    | 11.2<br>(8.1-15.2)  | 0.4<br>(0.2-0.8)              | 1.8<br>(1.0-3.2)    | 5.1<br>(4.0-6.4)    | 1.3<br>(0.7-2.4)                      | 1.4<br>(0.5-4.1)    | 4.5<br>(2.9-7.0)    |
|                 | <b>Every day</b>     | 1.0<br>(0.3-3.7)      | 3.5<br>(1.3-9.3)    | 7.6<br>(5.2-10.8)   | 0.8<br>(0.3-2.1)              | 1.5<br>(0.8-2.6)    | 6.4<br>(3.6-11.2)   | 1.1<br>(0.2-6.7)                      | 1.4<br>(0.3-5.8)    | 2.7<br>(1.5-4.7)    |
| <b>ICS-LABA</b> | <b>No</b>            | 89.3<br>(59.1-98.0)   | 70.6<br>(55.5-82.3) | 55.3<br>(37.9-71.4) | 95.2<br>(93.3-96.6)           | 85.7<br>(82.1-88.6) | 76.3<br>(69.6-81.2) | 87.7<br>(75.7-94.2)                   | 76.4<br>(66.9-83.9) | 68.8<br>(61.3-75.4) |
|                 | <b>As needed</b>     | 6.7<br>(0.8-39.3)     | 16.2<br>(3.8-49.1)  | 18.7<br>(4.5-52.8)  | 3.4<br>(2.1-5.6)              | 8.2<br>(7.1-9.4)    | 11.6<br>(9.3-14.5)  | 8.6<br>(3.3-20.7)                     | 16.3<br>(9.1-27.5)  | 20.5<br>(12.1-32.4) |
|                 | <b>Short courses</b> | 1.7<br>(0.4-6.7)      | 6.9<br>(4.0-11.7)   | 9.4<br>(4.9-17.6)   | 0.4<br>(0.2-0.8)              | 2.4<br>(1.1-5.2)    | 4.0<br>(2.3-7.0)    | 1.6<br>(0.7-3.6)                      | 2.9<br>(0.8-10.0)   | 4.5<br>(1.9-10.7)   |
|                 | <b>Every day</b>     | 2.3<br>(0.8-6.1)      | 6.2<br>(1.4-23.1)   | 16.5<br>(7.3-33.1)  | 1.0<br>(0.4-2.6)              | 3.8<br>(2.4-6.1)    | 8.1<br>(5.9-11.0)   | 2.1<br>(0.5-8.7)                      | 4.3<br>(2.8-6.7)    | 6.2<br>(3.6-10.5)   |

\*See text for definitions.

SABA: Inhaled short-acting beta2 agonist; LABA: Inhaled long-acting beta2 agonists; ICS: Inhaled corticosteroids; ICS-LABA: combinations of inhaled corticosteroids and long acting beta2 agonists.

**Web table 10. Proportion (and 95% confidence interval clustered by centre) of adults receiving oral medicines (and their regimens) according to the severity of symptoms stratified by country income category\*.**

|                     |                      | High income countries |                     |                      | Upper-middle income countries |                     |                     | Lower-middle and low income countries |                     |                     |
|---------------------|----------------------|-----------------------|---------------------|----------------------|-------------------------------|---------------------|---------------------|---------------------------------------|---------------------|---------------------|
|                     |                      | Asymptomatic          | Mild symptoms       | Severe symptoms      | Asymptomatic                  | Mild symptoms       | Severe symptoms     | Asymptomatic                          | Mild symptoms       | Severe symptoms     |
| <b>LTRA</b>         | <b>No</b>            | 95.0<br>(45.7-99.8)   | 93.2<br>(63.4-99.1) | 87.4<br>(33.8-98.9)  | 95.7<br>(89.8-98.2)           | 91.7<br>(75.4-97.5) | 79.6<br>(62.2-90.2) | 98.4<br>(92.3-99.7)                   | 98.6<br>(91.6-99.8) | 95.0<br>(78.0-99.0) |
|                     | <b>As needed</b>     | 3.8<br>(0.09-61.8)    | 5.2<br>(0.4-45.1)   | 7.4<br>(0.2-74.8)    | 2.9<br>(1.2-6.6)              | 5.1<br>(1.5-15.8)   | 8.9<br>(4.4-17.4)   | 1.6<br>(0.3-7.7)                      | 1.4<br>(0.2-8.4)    | 2.7<br>(0.4-15.1)   |
|                     | <b>Short courses</b> | 0.6<br>(0.06-5.1)     | 1.2<br>(0.2-5.5)    | 2.5<br>(0.7-8.9)     | 0.3<br>(0.05-1.5)             | 1.3<br>(0.2-6.7)    | 3.0<br>(1.3-6.5)    | ..                                    | ..                  | 1.9<br>(0.5-6.4)    |
|                     | <b>Every day</b>     | 0.7<br>(0.2-2.0)      | 0.4<br>(0.05-4.0)   | 2.7<br>(0.8-8.9)     | 1.2<br>(0.4-3.6)              | 2.0<br>(0.6-6.9)    | 8.5<br>(4.0-17.1)   | ..                                    | ..                  | 0.4<br>(0.05-3.6)   |
| <b>SABA</b>         | <b>No</b>            | 92.8<br>(27.4-99.8)   | 81.2<br>(49.1-95.1) | 70.9<br>(25.0-94.7)  | 92.4<br>(86.5-95.8)           | 88.4<br>(72.6-95.6) | 66.3<br>(44.6-82.8) | 95.3<br>(81.0-99.0)                   | 89.5<br>(70.7-96.8) | 85.5<br>(50.3-97.2) |
|                     | <b>As needed</b>     | 5.3<br>(0.2-65.6)     | 14.6<br>(3.4-45.8)  | 19.5<br>(3.0-65.2)   | 6.8<br>(3.8-11.9)             | 10.5<br>(3.9-25.6)  | 24.6<br>(13.2-41.2) | 3.9<br>(0.8-17.6)                     | 7.2<br>(2.1-22.1)   | 11.4<br>(1.7-48.9)  |
|                     | <b>Short courses</b> | 1.6<br>(0.07-29.1)    | 2.1<br>(0.05-46.5)  | 5.5<br>(0.7-31.8)    | 0.4<br>(0.1-1.3)              | 1.1<br>(0.4-3.3)    | 4.5<br>(2.2-8.8)    | 0.3<br>(0.05-1.9)                     | 1.1<br>(0.2-6.0)    | 1.0<br>(0.2-4.9)    |
|                     | <b>Every day</b>     | 0.2<br>(0.01-3.9)     | 2.1<br>(0.2-17.0)   | 4.1<br>(2.2-7.4)     | 0.5<br>(0.1-1.4)              | ..                  | 4.6<br>(2.2-9.1)    | 0.5<br>(0.08-3.0)                     | 2.2<br>(0.7-6.6)    | 2.1<br>(0.6-6.6)    |
| <b>OCS</b>          | <b>No</b>            | 95.8<br>(33.6-99.9)   | 90.8<br>(63.7-98.3) | 82.0<br>(33.3-97.7)  | 95.5<br>(90.4-97.9)           | 92.7<br>(77.6-97.9) | 75.4<br>(55.0-88.5) | 98.1<br>(92.5-99.5)                   | 98.2<br>(92.6-99.6) | 93.8<br>(86.4-97.3) |
|                     | <b>As needed</b>     | 3.8<br>(0.08-65.4)    | 7.7<br>(1.3-35.3)   | 12.4<br>(2.1-48.9)   | 3.8<br>(1.6-8.4)              | 6.2<br>(1.7-19.8)   | 19.1<br>(9.1-35.8)  | 1.8<br>(0.4-7.0)                      | 1.4<br>(0.2-8.2)    | 4.5<br>(1.5-13.1)   |
|                     | <b>Short courses</b> | 0.4<br>(0.03-4.0)     | 1.3<br>(0.4-4.0)    | 4.4<br>(1.0-17.7)    | 0.3<br>(0.08-1.0)             | 1.1<br>(0.2-4.9)    | 3.5<br>(1.7-7.3)    | ..                                    | ..                  | 1.4<br>(0.4-5.2)    |
|                     | <b>Every day</b>     | 0.07<br>(0.00-13.8)   | 0.1<br>(0.02-1.4)   | 1.1<br>(0.0008-62.0) | 0.5<br>(0.2-1.1)              | ..                  | 2.0<br>(0.9-4.5)    | 0.2<br>(0.02-1.5)                     | 0.4<br>(0.03-3.7)   | 0.2<br>(0.03-1.7)   |
| <b>Theophylline</b> | <b>No</b>            | 96.7<br>(26.8-100.0)  | 94.1<br>(44.4-99.7) | 89.3<br>(21.3-99.6)  | 98.3<br>(96.3-99.3)           | 95.1<br>(87.0-98.3) | 91.7<br>(83.2-96.1) | 99.8<br>(98.0-100.0)                  | 98.2<br>(88.7-99.7) | 95.2<br>(83.6-98.7) |
|                     | <b>As needed</b>     | 3.0<br>(0.04-72.4)    | 5.5<br>(0.3-55.9)   | 7.9<br>(0.4-66.9)    | 1.4<br>(0.6-3.2)              | 3.4<br>(0.9-11.8)   | 4.6<br>(2.2-9.2)    | ..                                    | 1.1<br>(0.1-10.5)   | 3.9<br>(1.0-14.0)   |
|                     | <b>Short courses</b> | 0.2<br>(0.00-32.7)    | 0.4<br>(0.04-5.2)   | 2.2<br>(0.03-60.6)   | 0.2<br>(0.07-0.5)             | 0.7<br>(0.2-2.3)    | 1.8<br>(0.7-4.9)    | 1.6<br>(0.01-2.0)                     | 0.4<br>(0.03-3.7)   | 0.6<br>(0.1-2.6)    |
|                     | <b>Every day</b>     | 0.07<br>(0.009-0.5)   | ..                  | 0.6<br>(0.2-2.1)     | 0.09<br>(0.01-0.9)            | 0.7<br>(0.4-1.5)    | 1.9<br>(0.9-4.2)    | ..                                    | 0.4<br>(0.03-3.7)   | 0.2<br>(0.02-1.7)   |

\*See text for definitions.

LTRA: Leukotriene receptor antagonists; SABA: Oral short acting beta2 agonists; OCS: Oral corticosteroids

**Web table 11. Association between receiving asthma medicine regimens and the severity of symptoms, having an asthma management plan and country income category among children#.**

|                          |                      | Severity of symptoms**† |                      | Asthma plan         | Country income category**‡ |                      |
|--------------------------|----------------------|-------------------------|----------------------|---------------------|----------------------------|----------------------|
|                          |                      | Mild                    | Severe               |                     | Upper Middle               | Lower Middle & Low   |
| <b>Inhaled medicines</b> |                      | 6.36<br>(5.40-7.48)     | 13.8<br>(11.5-16.5)  | 2.75<br>(2.40-3.15) | 1.18<br>(0.80-1.76)        | 0.74<br>(0.46-1.18)  |
|                          | <b>As needed</b>     | 5.74<br>(4.91-6.72)     | 8.07<br>(6.90-9.44)  | 2.28<br>(2.00-2.61) | 1.12<br>(0.71-1.75)        | 0.43<br>(0.26-0.72)  |
| <b>SABA</b>              | <b>Short courses</b> | 7.71<br>(5.80-10.2)     | 11.96<br>(9.08-15.7) | 2.19<br>(1.75-2.75) | 0.59<br>(0.34-1.02)        | 0.49<br>(0.26-0.94)  |
|                          | <b>Every day</b>     | 6.69<br>(4.04-11.07)    | 27.5<br>(17.9-42.3)  | 3.52<br>(2.46-5.05) | 0.79<br>(0.34-1.86)        | 0.47<br>(0.17-1.30)  |
|                          | <b>As needed</b>     | 2.67<br>(1.65-4.32)     | 2.55<br>(1.57-4.15)  | 0.83<br>(0.56-1.22) | 0.10<br>(0.13-0.83)        | 2.21<br>(0.31-15.5)  |
| <b>LABA</b>              | <b>Short courses</b> | 4.36<br>(1.70-11.1)     | 6.34<br>(2.63-15.3)  | 1.02<br>(0.54-1.91) | 0.24<br>(0.2-2.82)         | 5.33<br>(0.51-55.1)  |
|                          | <b>Every day</b>     | 2.19<br>(0.58-8.21)     | 4.66<br>(1.49-14.5)  | 2.12<br>(0.77-5.84) | 0.24<br>(0.04-1.56)        | 1.65<br>(0.29-9.51)  |
|                          | <b>As needed</b>     | 2.63<br>(2.15-3.22)     | 3.59<br>(2.98-4.33)  | 2.02<br>(1.70-2.41) | 1.49<br>(1.10-2.01)        | 0.64<br>(0.43-0.96)  |
| <b>ICS</b>               | <b>Short courses</b> | 4.51<br>(3.75-6.06)     | 5.05<br>(3.77-6.77)  | 1.50<br>(1.18-1.90) | 0.32<br>(0.22-0.48)        | 0.35<br>(0.21-0.58)  |
|                          | <b>Every day</b>     | 3.25<br>(2.54-4.15)     | 4.87<br>(3.86-6.14)  | 3.68<br>(2.94-4.62) | 0.38<br>(0.22-0.67)        | 0.20<br>(0.10-0.41)  |
|                          | <b>As needed</b>     | 2.26<br>(1.73-2.95)     | 2.87<br>(2.25-3.66)  | 1.88<br>(1.50-2.36) | 1.32<br>(0.86-2.04)        | 1.07<br>(0.62-1.85)  |
| <b>ICS-LABA</b>          | <b>Short courses</b> | 4.19<br>(2.71-6.47)     | 4.67<br>(3.08-7.09)  | 2.19<br>(1.53-3.14) | 0.53<br>(0.35-0.79)        | 0.72<br>(0.42-1.25)  |
|                          | <b>Every day</b>     | 2.92<br>(2.12-4.03)     | 3.59<br>(2.64-4.87)  | 2.78<br>(2.06-3.76) | 0.88<br>(0.51-1.52)        | 0.52<br>(0.26-1.08)  |
| <b>Oral medicines</b>    |                      | 3.74<br>(3.21-4.36)     | 6.89<br>(5.91-8.04)  | 1.86<br>(1.63-2.12) | 2.22<br>(1.39-3.54)        | 2.27<br>(1.32-3.90)  |
|                          | <b>As needed</b>     | 2.21<br>(1.69-2.90)     | 2.88<br>(2.24-3.69)  | 1.85<br>(1.45-2.35) | 3.88<br>(1.34-11.2)        | 1.02<br>(0.30-3.55)  |
| <b>LTRA</b>              | <b>Short courses</b> | 3.19<br>(2.22-4.59)     | 4.50<br>(3.13-6.46)  | 1.93<br>(1.38-2.68) | 2.75<br>(0.1-110.5)        | 0.20<br>(0.00-14.8)  |
|                          | <b>Every day</b>     | 2.99<br>(2.24-3.99)     | 4.54<br>(3.45-5.97)  | 2.84<br>(2.15-3.75) | 2.54<br>(0.64-10.1)        | 0.04<br>(0.00-0.24)  |
|                          | <b>As needed</b>     | 3.28<br>(2.67-4.04)     | 5.41<br>(4.43-6.60)  | 1.43<br>(1.20-1.71) | 0.81<br>(0.18-3.52)        | 0.21<br>(0.37-1.15)  |
| <b>OCS</b>               | <b>Short courses</b> | 3.10<br>(2.05-4.68)     | 7.56<br>(5.22-10.9)  | 1.45<br>(1.06-2.00) | 0.33<br>(0.25-4.35)        | 0.7<br>(0.00-1.53)   |
|                          | <b>Every day</b>     | 1.59<br>(0.58-4.33)     | 5.78<br>(2.67-12.5)  | 2.76<br>(1.15-6.60) | 2.94<br>(0.26-32.8)        | 0.13<br>(0.004-4.30) |
|                          | <b>As needed</b>     | 2.66<br>(2.21-3.21)     | 4.17<br>(3.49-4.98)  | 1.48<br>(1.26-1.75) | 1.74<br>(0.48-6.31)        | 0.40<br>(0.09-1.78)  |
| <b>SABA</b>              | <b>Short courses</b> | 3.03<br>(2.08-4.42)     | 5.56<br>(3.92-7.88)  | 1.19<br>(0.89-1.59) | 0.82<br>(0.28-2.41)        | 0.30<br>(0.79-1.12)  |
|                          | <b>Every day</b>     | 2.73<br>(1.02-7.33)     | 11.7<br>(5.11-26.7)  | 2.78<br>(1.32-5.84) | 0.90<br>(0.30-2.71)        | 0.24<br>(0.04-1.45)  |
|                          | <b>As needed</b>     | 1.65<br>(1.15-2.37)     | 2.18<br>(1.54-3.08)  | 1.52<br>(1.10-2.09) | 1.41<br>(0.39-5.15)        | 2.09<br>(0.46-9.50)  |
| <b>Theophylline</b>      | <b>Short courses</b> | 2.40<br>(1.20-4.81)     | 4.22<br>(2.21-8.06)  | 1.06<br>(0.61-1.82) | 2.70<br>(0.39-18.6)        | 4.4<br>(0.49-39.9)   |
|                          | <b>Every day</b>     | ..                      | 1.50<br>(0.24-9.42)  | 1.72<br>(0.18-16.1) | ..                         | ..                   |

#Adjusted for all variables in the table, age, and sex at the first level, school at the second and centre at the third level. Reference categories:

†Asymptomatic; ‡High income.

\*See text for definitions.

SABA: Short-acting beta2 agonist; LABA: Inhaled long-acting beta2 agonists; ICS: Inhaled corticosteroids; ICS-LABA: combinations of inhaled corticosteroids and long acting beta2 agonists; LTRA: Leukotriene receptor antagonists; OCS: Oral corticosteroids.

**Web table 12. Association between receiving asthma medicine regimens and the severity of symptoms, having an asthma management plan and country income category among adolescents<sup>#</sup>.**

|                          |                      | Severity of symptoms* <sup>†</sup> |                     | Asthma plan         | Country income category* <sup>‡</sup> |                     |
|--------------------------|----------------------|------------------------------------|---------------------|---------------------|---------------------------------------|---------------------|
|                          |                      | Mild                               | Severe              |                     | Upper Middle                          | Lower Middle & Low  |
| <b>Inhaled medicines</b> |                      | 4.08<br>(3.66-4.56)                | 7.96<br>(7.12-8.89) | 2.45<br>(2.25-2.67) | 0.64<br>(0.46-0.89)                   | 0.86<br>(0.59-1.24) |
|                          | <b>As needed</b>     | 3.38<br>(3.01-3.80)                | 5.07<br>(4.54-5.66) | 2.11<br>(1.92-2.31) | 0.66<br>(0.38-1.14)                   | 0.49<br>(0.27-0.91) |
| <b>SABA</b>              | <b>Short courses</b> | 3.77<br>(3.02-4.70)                | 10.3<br>(8.50-12.4) | 2.37<br>(2.01-2.79) | 0.45<br>(0.19-1.08)                   | 0.53<br>(0.20-1.38) |
|                          | <b>Every day</b>     | 4.38<br>(3.39-5.66)                | 14.0<br>(11.3-17.4) | 3.71<br>(3.04-4.52) | 0.36<br>(0.15-0.86)                   | 0.23<br>(0.09-0.59) |
|                          | <b>As needed</b>     | 1.48<br>(1.23-1.78)                | 3.02<br>(2.59-3.52) | 1.45<br>(1.26-1.67) | 0.93<br>(0.52-1.67)                   | 0.81<br>(0.42-1.55) |
| <b>LABA</b>              | <b>Short courses</b> | 1.16<br>(0.80-1.68)                | 3.13<br>(2.37-4.13) | 1.49<br>(1.15-1.93) | 1.33<br>(0.50-3.57)                   | 2.26<br>(0.76-6.69) |
|                          | <b>Every day</b>     | 1.80<br>(1.09-2.99)                | 4.38<br>(2.94-6.50) | 2.38<br>(1.61-3.51) | 1.44<br>(0.66-3.13)                   | 0.76<br>(0.30-1.93) |
|                          | <b>As needed</b>     | 1.70<br>(1.45-1.99)                | 3.15<br>(2.75-3.60) | 1.82<br>(1.61-2.07) | 0.62<br>(0.36-1.06)                   | 0.47<br>(0.25-0.86) |
| <b>ICS</b>               | <b>Short courses</b> | 2.26<br>(1.72-2.97)                | 4.85<br>(3.85-6.10) | 1.84<br>(1.49-2.26) | 0.53<br>(0.28-1.00)                   | 1.02<br>(0.51-2.07) |
|                          | <b>Every day</b>     | 2.40<br>(1.73-3.32)                | 5.83<br>(4.47-7.61) | 3.78<br>(2.88-4.96) | 0.52<br>(0.31-0.87)                   | 0.52<br>(0.28-0.95) |
|                          | <b>As needed</b>     | 1.90<br>(1.61-2.26)                | 3.21<br>(2.77-3.72) | 1.54<br>(1.35-1.76) | 0.57<br>(0.33-0.96)                   | 0.53<br>(0.29-0.96) |
| <b>ICS-LABA</b>          | <b>Short courses</b> | 1.82<br>(1.33-2.49)                | 4.23<br>(3.30-5.42) | 2.45<br>(1.93-3.12) | 0.60<br>(0.33-1.11)                   | 0.95<br>(0.48-1.88) |
|                          | <b>Every day</b>     | 2.62<br>(1.94-3.55)                | 4.80<br>(3.69-6.23) | 3.29<br>(2.54-4.25) | 0.28<br>(0.19-0.43)                   | 0.40<br>(0.24-0.65) |
| <b>Oral medicines</b>    |                      | 2.45<br>(2.19-2.75)                | 5.71<br>(5.16-6.33) | 1.53<br>(1.40-1.68) | 1.40<br>(1.04-1.90)                   | 2.91<br>(2.07-4.10) |
|                          | <b>As needed</b>     | 1.54<br>(1.26-1.88)                | 2.64<br>(2.23-3.13) | 1.54<br>(1.32-1.80) | 1.10<br>(0.36-3.38)                   | 0.36<br>(0.10-1.31) |
| <b>LTRA</b>              | <b>Short courses</b> | 2.60<br>(1.86-3.63)                | 3.78<br>(2.80-5.12) | 1.62<br>(1.23-2.14) | 0.94<br>(0.10-9.00)                   | 0.25<br>(0.02-3.30) |
|                          | <b>Every day</b>     | 2.36<br>(1.69-3.31)                | 5.26<br>(3.98-6.94) | 2.42<br>(1.86-3.17) | 0.87<br>(0.31-2.43)                   | 0.11<br>(0.03-0.40) |
|                          | <b>As needed</b>     | 1.49<br>(1.21-1.85)                | 3.78<br>(3.20-4.46) | 1.55<br>(1.33-1.82) | 0.95<br>(0.28-3.21)                   | 0.46<br>(0.12-1.82) |
| <b>OCS</b>               | <b>Short courses</b> | 1.42<br>(0.91-2.20)                | 4.38<br>(3.17-6.04) | 1.71<br>(1.26-2.33) | 0.73<br>(0.16-3.33)                   | 0.52<br>(0.09-2.91) |
|                          | <b>Every day</b>     | 0.78<br>(0.34-1.79)                | 6.28<br>(3.96-9.96) | 1.36<br>(0.90-2.08) | 0.78<br>(0.22-2.72)                   | 0.40<br>(0.09-1.79) |
|                          | <b>As needed</b>     | 2.31<br>(1.99-2.68)                | 3.69<br>(3.23-4.21) | 1.52<br>(1.34-1.71) | 0.79<br>(0.19-3.22)                   | 0.30<br>(0.06-1.43) |
| <b>SABA</b>              | <b>Short courses</b> | 1.70<br>(1.20-2.38)                | 5.86<br>(4.54-7.56) | 1.75<br>(1.38-2.22) | 0.40<br>(0.09-1.79)                   | 0.18<br>(0.03-1.00) |
|                          | <b>Every day</b>     | 2.83<br>(1.82-4.39)                | 9.71<br>(6.84-13.8) | 2.44<br>(1.79-3.32) | 0.41<br>(0.11-1.51)                   | 0.13<br>(0.03-0.63) |
|                          | <b>As needed</b>     | 1.33<br>(1.04-1.70)                | 2.81<br>(2.31-3.41) | 1.35<br>(1.13-1.62) | 1.11<br>(0.36-3.42)                   | 0.41<br>(0.11-1.59) |
| <b>Theophylline</b>      | <b>Short courses</b> | 1.16<br>(0.66-2.02)                | 2.91<br>(1.91-4.44) | 1.25<br>(0.85-1.84) | 1.15<br>(0.21-6.39)                   | 0.43<br>(0.05-3.42) |
|                          | <b>Every day</b>     | 0.55<br>(0.19-1.62)                | 2.10<br>(1.09-4.08) | 1.31<br>(0.70-2.47) | 0.94<br>(0.19-4.65)                   | 0.11<br>(0.01-0.98) |

<sup>#</sup>Adjusted for all variables in the table, age, and sex at the first level, school at the second and centre at the third level. Reference categories:

<sup>†</sup>Asymptomatic; <sup>‡</sup>High income.

\*See text for definitions.

SABA: Short-acting beta2 agonist; LABA: Inhaled long-acting beta2 agonists; ICS: Inhaled corticosteroids; ICS-LABA: combinations of inhaled corticosteroids and long acting beta2 agonists; LTRA: Leukotriene receptor antagonists; OCS: Oral corticosteroids.



**Web table 13. Association between receiving asthma medicine regimens and the severity of symptoms, having an asthma management plan and country income category among adults<sup>#</sup>.**

|                          |                      | Severity of symptoms* <sup>†</sup> |                     | Asthma plan         | Country income category* <sup>‡</sup> |                     |
|--------------------------|----------------------|------------------------------------|---------------------|---------------------|---------------------------------------|---------------------|
|                          |                      | Mild                               | Severe              |                     | Upper Middle                          | Lower Middle & Low  |
| <b>Inhaled medicines</b> |                      | 5.89<br>(5.02-6.91)                | 16.0<br>(13.4-19.1) | 2.75<br>(2.38-3.16) | 0.99<br>(0.47-2.07)                   | 0.96<br>(0.42-2.17) |
|                          | <b>As needed</b>     | 4.51<br>(3.84-5.30)                | 8.67<br>(7.40-10.2) | 2.33<br>(2.03-2.67) | 0.86<br>(0.45-1.67)                   | 0.61<br>(0.29-1.27) |
| <b>SABA</b>              | <b>Short courses</b> | 3.66<br>(2.71-4.93)                | 7.05<br>(5.9-45)    | 1.36<br>(1.06-1.75) | 0.73<br>(0.22-2.41)                   | 0.45<br>(0.12-1.69) |
|                          | <b>Every day</b>     | 3.33<br>(2.15-5.17)                | 17.5<br>(12.3-25.1) | 3.42<br>(2.54-4.61) | 0.74<br>(0.46-1.19)                   | 0.47<br>(0.27-0.81) |
|                          | <b>As needed</b>     | 2.68<br>(1.99-3.62)                | 4.41<br>(3.30-5.87) | 2.02<br>(1.59-2.57) | 1.00<br>(0.33-3.05)                   | 1.16<br>(0.33-4.01) |
| <b>LABA</b>              | <b>Short courses</b> | 2.61<br>(1.36-4.99)                | 8.11<br>(4.62-14.3) | 1.95<br>(1.28-3.00) | 1.27<br>(0.42-3.86)                   | 1.73<br>(0.51-5.85) |
|                          | <b>Every day</b>     | 1.91<br>(0.99-3.68)                | 5.49<br>(3.15-9.58) | 3.52<br>(2.16-5.73) | 1.21<br>(0.41-3.55)                   | 0.49<br>(0.13-1.81) |
|                          | <b>As needed</b>     | 2.81<br>(2.21-3.56)                | 3.76<br>(3.01-4.68) | 2.00<br>(1.65-2.43) | 0.64<br>(0.34-1.20)                   | 0.39<br>(0.19-0.80) |
| <b>ICS</b>               | <b>Short courses</b> | 3.13<br>(2.02-4.85)                | 7.86<br>(5.35-11.5) | 1.77<br>(1.31-2.39) | 0.25<br>(0.16-0.39)                   | 0.27<br>(0.16-0.45) |
|                          | <b>Every day</b>     | 2.81<br>(1.67-4.73)                | 7.53<br>(4.83-11.7) | 2.75<br>(1.88-4.03) | 0.63<br>(0.35-1.12)                   | 0.27<br>(0.13-0.57) |
|                          | <b>As needed</b>     | 2.34<br>(1.85-2.95)                | 3.65<br>(2.93-4.54) | 2.15<br>(1.78-2.61) | 0.38<br>(0.19-0.75)                   | 0.99<br>(0.47-2.11) |
| <b>ICS-LABA</b>          | <b>Short courses</b> | 4.38<br>(2.84-6.74)                | 7.26<br>(4.80-11.0) | 1.90<br>(1.39-2.59) | 0.22<br>(0.13-0.40)                   | 0.31<br>(0.16-0.60) |
|                          | <b>Every day</b>     | 3.17<br>(2.18-4.60)                | 8.05<br>(5.77-11.2) | 2.52<br>(1.92-3.31) | 0.34<br>(0.24-0.48)                   | 0.36<br>(0.24-0.54) |
| <b>Oral medicines</b>    |                      | 3.88<br>(3.27-4.60)                | 9.06<br>(7.69-10.7) | 1.78<br>(1.55-2.04) | 2.15<br>(1.13-4.09)                   | 2.35<br>(1.15-4.83) |
|                          | <b>As needed</b>     | 1.68<br>(1.18-2.39)                | 2.58<br>(1.91-3.48) | 1.81<br>(1.37-2.39) | 1.14<br>(0.27-4.90)                   | 0.20<br>(0.04-1.10) |
| <b>LTRA</b>              | <b>Short courses</b> | 3.96<br>(1.69-9.26)                | 10.5<br>(4.97-22.3) | 2.63<br>(1.49-4.64) | 1.22<br>(0.08-17.8)                   | 0.09<br>(0.03-2.28) |
|                          | <b>Every day</b>     | 1.50<br>(0.73-3.08)                | 7.14<br>(4.30-11.9) | 3.16<br>(1.96-5.10) | 2.92<br>(0.41-21.1)                   | 0.04<br>(0.02-0.54) |
|                          | <b>As needed</b>     | 2.21<br>(1.61-3.05)                | 4.90<br>(3.75-6.41) | 1.99<br>(1.55-2.56) | 1.19<br>(0.19-7.48)                   | 0.28<br>(0.03-2.28) |
| <b>OCS</b>               | <b>Short courses</b> | 4.09<br>(1.68-9.96)                | 15.8<br>(7.45-33.4) | 2.16<br>(1.31-3.58) | 0.68<br>(0.14-3.25)                   | 0.18<br>(0.03-1.22) |
|                          | <b>Every day</b>     | 1.04<br>(0.20-5.42)                | 8.07<br>(3.01-21.7) | 7.72<br>(2.26-26.4) | 1.21<br>(0.12-12.2)                   | 0.18<br>(0.09-3.31) |
|                          | <b>As needed</b>     | 2.80<br>(2.19-3.59)                | 4.77<br>(3.84-5.91) | 1.60<br>(1.32-1.94) | 1.63<br>(0.24-11.2)                   | 0.40<br>(0.05-3.51) |
| <b>SABA</b>              | <b>Short courses</b> | 2.29<br>(1.21-4.32)                | 7.56<br>(4.61-12.4) | 1.44<br>(0.96-2.16) | 0.97<br>(0.17-5.52)                   | 0.21<br>(0.03-1.60) |
|                          | <b>Every day</b>     | 5.21<br>(2.32-11.7)                | 15.1<br>(7.4-30.7)  | 4.3<br>(2.49-7.43)  | 1.01<br>(0.30-3.43)                   | 0.64<br>(0.16-2.58) |
|                          | <b>As needed</b>     | 2.34<br>(1.56-3.51)                | 3.24<br>(2.25-4.65) | 1.62<br>(1.18-2.22) | 0.70<br>(0.15-3.37)                   | 0.16<br>(0.02-1.12) |
| <b>Theophylline</b>      | <b>Short courses</b> | 4.81<br>(1.43-16.2)                | 11.9<br>(4.13-34.5) | 2.17<br>(1.07-4.39) | 1.12<br>(0.15-8.31)                   | 0.14<br>(0.01-1.85) |
|                          | <b>Every day</b>     | 6.12<br>(1.16-32.3)                | 14.0<br>(3.16-62.2) | 1.51<br>(0.62-3.65) | 6.0<br>(1.30-27.4)                    | 0.39<br>(0.04-3.44) |

<sup>#</sup>Adjusted for all variables in the table, age, and sex at the first level, school at the second and centre at the third level. Reference categories:

<sup>†</sup>Asymptomatic; <sup>‡</sup>High income.

\*See text for definitions.

SABA: Short-acting beta2 agonist; LABA: Inhaled long-acting beta2 agonists; ICS: Inhaled corticosteroids; ICS-LABA: combinations of inhaled corticosteroids and long acting beta2 agonists; LTRA: Leukotriene receptor antagonists; OCS: Oral corticosteroids.

**Web Table 14. Factors associated to poor control\* of asthma among children in the multilevel analysis#.**

|                                            |                               |                      | All the population  | High income countries | Upper-Middle income countries | Lower Middle & Low income countries |
|--------------------------------------------|-------------------------------|----------------------|---------------------|-----------------------|-------------------------------|-------------------------------------|
| <b>Severity of symptoms<sup>†</sup></b>    |                               |                      |                     |                       |                               |                                     |
|                                            | <b>Mild</b>                   |                      | 2.54<br>(2.21-2.92) | 2.76<br>(2.24-3.39)   | 2.42<br>(1.93-3.03)           | 2.09<br>(1.47-2.97)                 |
|                                            | <b>Severe</b>                 |                      | 6.32<br>(5.48-7.30) | 7.46<br>(5.89-9.45)   | 5.72<br>(4.59-7.11)           | 5.58<br>(3.90-7.98)                 |
| <b>Country income category<sup>‡</sup></b> |                               |                      |                     |                       |                               |                                     |
|                                            | <b>Upper middle</b>           |                      | 0.94<br>(0.57-1.56) | N.A.                  | N.A.                          | N.A.                                |
|                                            | <b>Lower middle &amp; Low</b> |                      | 2.37<br>(1.33-4.19) | N.A.                  | N.A.                          | N.A.                                |
| <b>Asthma plan</b>                         |                               |                      | 1.16<br>(1.03-1.30) | 1.02<br>(0.85-1.22)   | 1.13<br>(0.94-1.37)           | 1.58<br>(1.18-2.11)                 |
| <b>Inhaled medicines<sup>§</sup></b>       |                               |                      |                     |                       |                               |                                     |
|                                            | <b>SABA</b>                   | <b>As needed</b>     | 1.89<br>(1.64-2.17) | 1.91<br>(1.53-2.39)   | 1.90<br>(1.54-2.35)           | 2.08<br>(1.44-2.99)                 |
|                                            |                               | <b>Short courses</b> | 2.60<br>(2.09-3.24) | 2.50<br>(1.80-3.47)   | 2.94<br>(2.03-4.26)           | 2.03<br>(1.15-3.56)                 |
|                                            |                               | <b>Every day</b>     | 3.51<br>(2.51-4.89) | 3.91<br>(2.33-6.54)   | 3.69<br>(2.28-6.12)           | 2.74<br>(0.99-7.59)                 |
|                                            | <b>LABA</b>                   | <b>As needed</b>     | 1.08<br>(0.73-1.59) | 1.37<br>(0.76-2.47)   | 0.84<br>(0.40-1.74)           | 0.97<br>(0.45-2.06)                 |
|                                            |                               | <b>Short courses</b> | 0.90<br>(0.50-1.63) | 1.01<br>(0.33-3.04)   | 1.28<br>(0.49-3.33)           | 0.75<br>(0.26-2.18)                 |
|                                            |                               | <b>Every day</b>     | 1.03<br>(0.43-2.47) | 1.35<br>(0.40-4.55)   | 1.33<br>(0.28-6.33)           | 0.42<br>(0.06-3.23)                 |
|                                            | <b>ICS</b>                    | <b>As needed</b>     | 1.17<br>(0.99-1.38) | 1.15<br>(0.86-1.53)   | 1.36<br>(1.09-1.69)           | 0.66<br>(0.38-1.15)                 |
|                                            |                               | <b>Short courses</b> | 1.09<br>(0.87-1.38) | 1.27<br>(0.94-1.73)   | 0.91<br>(0.60-1.37)           | 0.88<br>(0.43-1.80)                 |
|                                            |                               | <b>Every day</b>     | 1.14<br>(0.95-1.37) | 1.01<br>(0.78-1.30)   | 1.47<br>(1.08-2.01)           | 1.25<br>(0.58-2.72)                 |
|                                            | <b>ICS-LABA</b>               | <b>As needed</b>     | 1.07<br>(0.88-1.32) | 1.01<br>(0.70-1.44)   | 1.20<br>(0.91-1.59)           | 0.97<br>(0.53-1.77)                 |
|                                            |                               | <b>Short courses</b> | 1.60<br>(1.17-2.20) | 1.31<br>(0.85-2.04)   | 2.11<br>(1.22-3.67)           | 1.51<br>(0.57-3.96)                 |
|                                            |                               | <b>Every day</b>     | 1.25<br>(0.99-1.59) | 1.32<br>(0.93-1.87)   | 1.15<br>(0.80-1.66)           | 1.17<br>(0.48-2.85)                 |
| <b>Oral medicines<sup>§</sup></b>          |                               |                      |                     |                       |                               |                                     |
|                                            | <b>LTRA</b>                   | <b>As needed</b>     | 1.24<br>(1.00-1.54) | 1.32<br>(0.86-2.03)   | 1.26<br>(0.96-1.67)           | 1.12<br>(0.61-2.07)                 |
|                                            |                               | <b>Short courses</b> | 0.95<br>(0.71-1.27) | 1.15<br>(0.76-1.72)   | 0.77<br>(0.46-1.29)           | 0.97<br>(0.43-2.20)                 |
|                                            |                               | <b>Every day</b>     | 1.22<br>(1.00-1.49) | 1.15<br>(0.83-1.58)   | 1.20<br>(0.91-1.57)           | 1.47<br>(0.23-9.29)                 |
|                                            | <b>OCS</b>                    | <b>As needed</b>     | 1.86<br>(1.60-2.17) | 2.19<br>(1.74-2.76)   | 1.48<br>(1.17-1.87)           | 2.65<br>(1.68-4.20)                 |
|                                            |                               | <b>Short courses</b> | 1.52<br>(1.14-2.02) | 1.88<br>(1.25-2.83)   | 0.95<br>(0.56-1.63)           | 2.12<br>(1.06-4.27)                 |
|                                            |                               | <b>Every day</b>     | 2.03<br>(1.05-3.92) | 1.34<br>(0.34-5.26)   | 2.98<br>(1.28-6.92)           | 0.32<br>(0.04-2.76)                 |
|                                            | <b>SABA</b>                   | <b>As needed</b>     | 1.55<br>(1.34-1.80) | 1.48<br>(1.16-1.88)   | 1.72<br>(1.40-2.11)           | 1.23<br>(0.72-2.10)                 |
|                                            |                               | <b>Short courses</b> | 1.79<br>(1.35-2.38) | 1.89<br>(1.26-2.83)   | 2.45<br>(1.55-3.87)           | 0.37<br>(0.13-1.01)                 |
|                                            |                               | <b>Every day</b>     | 2.59<br>(1.42-4.73) | 1.98<br>(0.84-4.67)   | 3.47<br>(1.35-8.93)           | 2.64<br>(0.16-43.88)                |
|                                            | <b>Theophylline</b>           | <b>As needed</b>     | 1.06<br>(0.79-1.41) | 1.16<br>(0.69-1.95)   | 0.97<br>(0.60-1.57)           | 0.85<br>(0.47-1.53)                 |
|                                            |                               | <b>Short courses</b> | 0.97<br>(0.57-1.65) | 0.39<br>(0.12-1.26)   | 2.38<br>(0.84-6.73)           | 0.80<br>(0.31-2.05)                 |
|                                            |                               | <b>Every day</b>     | 0.42<br>(0.06-2.99) | ..                    | 0.14<br>(0.01-1.35)           | ..                                  |

\*See text for definition of control.

#Adjusted for all variables in the table, age, and sex at the first level, school at the second and centre at the third level.

Reference categories: <sup>†</sup>Asymptomatic; <sup>‡</sup>High income; <sup>§</sup>Not receiving the specific medication.

SABA: Short-acting beta2 agonist; LABA: Inhaled long-acting beta2 agonists; ICS: Inhaled corticosteroids; ICS-LABA: combinations of inhaled corticosteroids and long acting beta2 agonists; LTRA: Leukotriene receptor antagonists; OCS: Oral corticosteroids.

N.A.: Not applicable.

**Web Table 15. Factors associated to poor control\* of asthma among adolescents in the multilevel analysis#.**

|                                 |                               |                      | <b>All the population</b> | <b>High income countries</b> | <b>Upper-Middle income countries</b> | <b>Lower Middle &amp; Low income countries</b> |
|---------------------------------|-------------------------------|----------------------|---------------------------|------------------------------|--------------------------------------|------------------------------------------------|
| <b>Severity of symptoms†</b>    |                               |                      |                           |                              |                                      |                                                |
|                                 | <b>Mild</b>                   |                      | 1.65<br>(1.49-1.83)       | 1.58<br>(1.34-1.86)          | 1.77<br>(1.51-2.09)                  | 1.62<br>(1.23-1.12)                            |
|                                 | <b>Severe</b>                 |                      | 3.67<br>(3.33-4.05)       | 3.56<br>(3.03-4.18)          | 3.74<br>(3.23-4.33)                  | 4.05<br>(3.16-5.21)                            |
| <b>Country income category‡</b> |                               |                      |                           |                              |                                      |                                                |
|                                 | <b>Upper middle</b>           |                      | 2.40<br>(1.34-4.28)       | N.A.                         | N.A.                                 | N.A.                                           |
|                                 | <b>Lower middle &amp; Low</b> |                      | 3.49<br>(1.84-6.59)       | N.A.                         | N.A.                                 | N.A.                                           |
| <b>Asthma plan</b>              |                               |                      | 1.29<br>(1.19-1.40)       | 1.36<br>(1.19-1.55)          | 1.23<br>(1.08-1.40)                  | 1.34<br>(1.09-1.63)                            |
| <b>Inhaled medicines§</b>       |                               |                      |                           |                              |                                      |                                                |
|                                 | <b>SABA</b>                   | <b>As needed</b>     | 1.81<br>(1.63-2.00)       | 2.02<br>(1.71-2.39)          | 1.60<br>(1.37-1.87)                  | 2.00<br>(1.54-2.60)                            |
|                                 |                               | <b>Short courses</b> | 2.46<br>(2.07-2.91)       | 3.22<br>(2.53-4.11)          | 1.76<br>(1.31-2.38)                  | 2.23<br>(1.44-3.45)                            |
|                                 |                               | <b>Every day</b>     | 3.09<br>(2.55-3.76)       | 3.57<br>(2.74-4.65)          | 2.71<br>(1.87-3.92)                  | 3.22<br>(1.75-5.94)                            |
|                                 | <b>LABA</b>                   | <b>As needed</b>     | 1.13<br>(0.95-1.35)       | 1.07<br>(0.82-1.39)          | 1.32<br>(1.00-1.75)                  | 0.99<br>(0.61-1.61)                            |
|                                 |                               | <b>Short courses</b> | 1.23<br>(0.92-1.63)       | 1.99<br>(1.24-3.19)          | 0.94<br>(0.57-1.54)                  | 1.06<br>(0.61-1.85)                            |
|                                 |                               | <b>Every day</b>     | 1.72<br>(1.15-2.56)       | 1.71<br>(0.93-3.17)          | 1.91<br>(1.04-3.52)                  | 1.73<br>(0.55-5.38)                            |
|                                 | <b>ICS</b>                    | <b>As needed</b>     | 1.24<br>(1.06-1.45)       | 1.08<br>(0.85-1.36)          | 1.46<br>(1.14-1.86)                  | 1.21<br>(0.80-1.85)                            |
|                                 |                               | <b>Short courses</b> | 1.44<br>(1.16-1.79)       | 1.61<br>(1.17-2.20)          | 1.57<br>(1.06-2.33)                  | 0.96<br>(0.58-1.58)                            |
|                                 |                               | <b>Every day</b>     | 1.31<br>(1.04-1.66)       | 0.98<br>(0.70-1.36)          | 2.07<br>(1.34-3.19)                  | 1.43<br>(0.78-2.62)                            |
|                                 | <b>ICS-LABA</b>               | <b>As needed</b>     | 0.84<br>(0.71-0.99)       | 0.93<br>(0.73-1.19)          | 0.71<br>(0.54-0.93)                  | 0.90<br>(0.56-1.44)                            |
|                                 |                               | <b>Short courses</b> | 1.11<br>(0.87-1.41)       | 1.04<br>(0.74-1.48)          | 1.16<br>(0.74-1.81)                  | 1.33<br>(0.75-2.34)                            |
|                                 |                               | <b>Every day</b>     | 0.97<br>(0.77-1.23)       | 1.10<br>(0.82-1.49)          | 0.63<br>(0.38-1.06)                  | 0.90<br>(0.48-1.69)                            |
| <b>Oral medicines§</b>          |                               |                      |                           |                              |                                      |                                                |
|                                 | <b>LTRA</b>                   | <b>As needed</b>     | 1.10<br>(0.92-1.33)       | 1.28<br>(0.93-1.76)          | 1.01<br>(0.77-1.32)                  | 1.32<br>(0.81-2.15)                            |
|                                 |                               | <b>Short courses</b> | 1.20<br>(0.91-1.57)       | 1.65<br>(1.06-2.55)          | 0.86<br>(0.56-1.30)                  | 1.81<br>(0.91-3.63)                            |
|                                 |                               | <b>Every day</b>     | 1.23<br>(0.97-1.56)       | 1.30<br>(0.91-1.86)          | 1.14<br>(0.81-1.61)                  | 1.75<br>(0.54-5.62)                            |
|                                 | <b>OCS</b>                    | <b>As needed</b>     | 1.26<br>(1.05-1.51)       | 1.43<br>(1.05-1.95)          | 1.17<br>(0.91-1.52)                  | 1.23<br>(0.77-1.97)                            |
|                                 |                               | <b>Short courses</b> | 2.08<br>(1.48-2.92)       | 2.49<br>(1.50-4.13)          | 1.79<br>(0.96-3.33)                  | 2.00<br>(0.93-4.29)                            |
|                                 |                               | <b>Every day</b>     | 1.47<br>(0.93-2.33)       | 1.39<br>(0.69-2.78)          | 1.34<br>(0.62-2.88)                  | 1.94<br>(0.55-6.89)                            |
|                                 | <b>SABA</b>                   | <b>As needed</b>     | 1.37<br>(1.20-1.56)       | 1.45<br>(1.19-1.76)          | 1.28<br>(1.04-1.58)                  | 1.45<br>(1.01-2.08)                            |
|                                 |                               | <b>Short courses</b> | 1.69<br>(1.32-2.17)       | 2.14<br>(1.56-2.95)          | 1.23<br>(0.74-2.03)                  | 1.09<br>(0.55-2.17)                            |
|                                 |                               | <b>Every day</b>     | 1.38<br>(1.01-1.88)       | 1.27<br>(0.85-1.89)          | 1.58<br>(0.87-2.88)                  | 3.55<br>(0.85-14.82)                           |
|                                 | <b>Theophylline</b>           | <b>As needed</b>     | 1.01<br>(0.79-1.28)       | 0.65<br>(0.42-1.00)          | 1.34<br>(0.93-1.94)                  | 1.09<br>(0.63-1.89)                            |
|                                 |                               | <b>Short courses</b> | 1.91<br>(1.22-2.98)       | 1.70<br>(0.80-3.58)          | 2.05<br>(0.89-4.74)                  | 1.17<br>(0.51-2.71)                            |
|                                 |                               | <b>Every day</b>     | 0.98<br>(0.44-2.16)       | 1.29<br>(0.44-3.82)          | 0.45<br>(0.12-1.61)                  | 1.74<br>(0.13-22.64)                           |

\*See text for definition of control.

#Adjusted for all variables in the table, age, and sex at the first level, school at the second and centre at the third level.

Reference categories: †Asymptomatic; ‡High income; §Not receiving the specific medication.

SABA: Short-acting beta2 agonist; LABA: Inhaled long-acting beta2 agonists; ICS: Inhaled corticosteroids; ICS-LABA: combinations of inhaled corticosteroids and long acting beta2 agonists; LTRA: Leukotriene receptor antagonists; OCS: Oral corticosteroids.

N.A.: Not applicable.

Web Table 16. Factors associated to poor control\* of asthma among adults in the multilevel analysis#.

|                                 |                               |                      | All the population  | High income         | Upper-Middle income | Lower Middle & Low income |
|---------------------------------|-------------------------------|----------------------|---------------------|---------------------|---------------------|---------------------------|
| <b>Severity of symptoms†</b>    |                               |                      |                     |                     |                     |                           |
|                                 | <b>Mild</b>                   |                      | 1.86<br>(1.58-2.19) | 2.01<br>(1.55-2.60) | 2.24<br>(1.68-3.00) | 1.23<br>(0.88-1.71)       |
|                                 | <b>Severe</b>                 |                      | 5.52<br>(4.72-6.46) | 5.26<br>(4.03-6.86) | 6.18<br>(4.72-8.09) | 4.50<br>(3.28-6.16)       |
| <b>Country income category‡</b> |                               |                      |                     |                     |                     |                           |
|                                 | <b>Upper middle</b>           |                      | 1.48<br>(0.81-2.70) | N.A.                | N.A.                | N.A.                      |
|                                 | <b>Lower middle &amp; Low</b> |                      | 5.15<br>(2.64-10.0) | N.A.                | N.A.                | N.A.                      |
| <b>Asthma plan</b>              |                               |                      | 1.21<br>(1.07-1.38) | 1.00<br>(0.80-1.24) | 1.17<br>(0.95-1.44) | 1.71<br>(1.31-2.23)       |
| <b>Inhaled medication§</b>      |                               |                      |                     |                     |                     |                           |
|                                 | <b>iSABA</b>                  | <b>As needed</b>     | 1.78<br>(1.53-2.08) | 1.17<br>(0.91-1.52) | 2.24<br>(1.72-2.92) | 2.37<br>(1.70-3.31)       |
|                                 |                               | <b>Short courses</b> | 1.37<br>(1.06-1.77) | 1.54<br>(1.00-2.37) | 1.83<br>(1.23-2.73) | 0.70<br>(0.34-1.45)       |
|                                 |                               | <b>Every day</b>     | 2.11<br>(1.57-2.83) | 1.38<br>(0.84-2.26) | 2.93<br>(1.82-4.71) | 2.29<br>(1.07-4.89)       |
|                                 | <b>LABA</b>                   | <b>As needed</b>     | 1.65<br>(1.30-2.10) | 1.48<br>(0.93-2.35) | 1.97<br>(1.38-2.81) | 1.19<br>(0.53-2.70)       |
|                                 |                               | <b>Short courses</b> | 1.58<br>(1.04-2.40) | 1.66<br>(0.72-3.80) | 2.57<br>(1.41-4.68) | 1.09<br>(0.31-3.83)       |
|                                 |                               | <b>Every day</b>     | 2.35<br>(1.47-3.75) | 1.37<br>(0.54-3.48) | 2.58<br>(1.39-4.81) | 10.8<br>(1.62-71.6)       |
|                                 | <b>ICS</b>                    | <b>As needed</b>     | 1.26<br>(1.02-1.56) | 1.23<br>(0.86-1.75) | 1.45<br>(1.07-1.98) | 1.09<br>(0.52-2.27)       |
|                                 |                               | <b>Short courses</b> | 1.79<br>(1.29-2.49) | 2.19<br>(1.44-3.33) | 2.23<br>(1.17-4.25) | 0.40<br>(0.11-1.44)       |
|                                 |                               | <b>Every day</b>     | 1.43<br>(1.00-2.06) | 1.12<br>(0.63-2.00) | 1.97<br>(1.13-3.44) | 0.67<br>(0.21-2.17)       |
|                                 | <b>ICS-LABA</b>               | <b>As needed</b>     | 0.99<br>(0.81-1.22) | 1.24<br>(0.89-1.75) | 1.10<br>(0.77-1.57) | 0.85<br>(0.54-1.33)       |
|                                 |                               | <b>Short courses</b> | 1.85<br>(1.32-2.58) | 2.07<br>(1.34-3.19) | 1.85<br>(0.97-3.54) | 1.42<br>(0.48-4.22)       |
|                                 |                               | <b>Every day</b>     | 1.48<br>(1.14-1.92) | 1.75<br>(1.18-2.60) | 1.60<br>(1.01-2.52) | 1.19<br>(0.64-2.24)       |
| <b>Oral medication§</b>         |                               |                      |                     |                     |                     |                           |
|                                 | <b>LTRA</b>                   | <b>As needed</b>     | 1.32<br>(0.98-1.80) | 1.09<br>(0.60-2.00) | 1.58<br>(1.06-2.36) | 1.44<br>(0.52-4.01)       |
|                                 |                               | <b>Short courses</b> | 1.34<br>(0.81-2.20) | 0.66<br>(0.28-1.56) | 2.15<br>(1.08-4.27) | 1.12<br>(0.16-7.94)       |
|                                 |                               | <b>Every day</b>     | 1.29<br>(0.87-1.93) | 1.17<br>(0.48-2.85) | 1.41<br>(0.87-2.30) | 0.60<br>(0.03-10.8)       |
|                                 | <b>OCS</b>                    | <b>As needed</b>     | 1.20<br>(0.94-1.54) | 2.24<br>(1.44-3.48) | 0.93<br>(0.67-1.30) | 0.82<br>(0.29-2.30)       |
|                                 |                               | <b>Short courses</b> | 1.89<br>(1.18-3.03) | 4.52<br>(2.21-9.27) | 0.90<br>(0.45-1.81) | 5.86<br>(0.39-87.2)       |
|                                 |                               | <b>Every day</b>     | 0.75<br>(0.34-1.66) | 3.83<br>(0.75-19.5) | 0.38<br>(0.14-1.03) | 2.67<br>(0.14-52.0)       |
|                                 | <b>SABA</b>                   | <b>As needed</b>     | 1.88<br>(1.55-2.28) | 2.44<br>(1.76-3.39) | 1.69<br>(1.27-2.26) | 2.05<br>(1.18-3.56)       |
|                                 |                               | <b>Short courses</b> | 1.60<br>(1.09-2.36) | 1.44<br>(0.80-2.59) | 2.06<br>(1.12-3.79) | 1.91<br>(0.46-7.95)       |
|                                 |                               | <b>Every day</b>     | 2.26<br>(1.46-3.49) | 2.82<br>(1.42-5.58) | 3.30<br>(1.66-6.58) | 0.72<br>(0.22-2.31)       |
|                                 | <b>Theophylline</b>           | <b>As needed</b>     | 1.25<br>(0.89-1.76) | 0.65<br>(0.34-1.22) | 1.66<br>(0.99-2.78) | 3.32<br>(0.90-12.3)       |
|                                 |                               | <b>Short courses</b> | 1.23<br>(0.66-2.32) | 0.83<br>(0.31-2.23) | 1.09<br>(0.43-2.76) | 8.12<br>(0.63-105.0)      |
|                                 |                               | <b>Every day</b>     | 4.18<br>(1.63-10.7) | 7.42<br>(0.66-83.1) | 2.65<br>(0.87-8.10) | ..                        |

\*See text for definition of control.

#Adjusted for all variables in the table, age, and sex at the first level, school at the second and centre at the third level.

Reference categories: †Asymptomatic; ‡High income category; §Not receiving the specific medication.

SABA: Short-acting beta2 agonist; LABA: Inhaled long-acting beta2 agonists; ICS: Inhaled corticosteroids; ICS-LABA: combinations of inhaled corticosteroids and long acting beta2 agonists; LTRA: Leukotriene receptor antagonists; OCS: Oral corticosteroids.

N.A.: Not applicable.

### A) Type of asthma symptoms

### B) Degree of asthma control

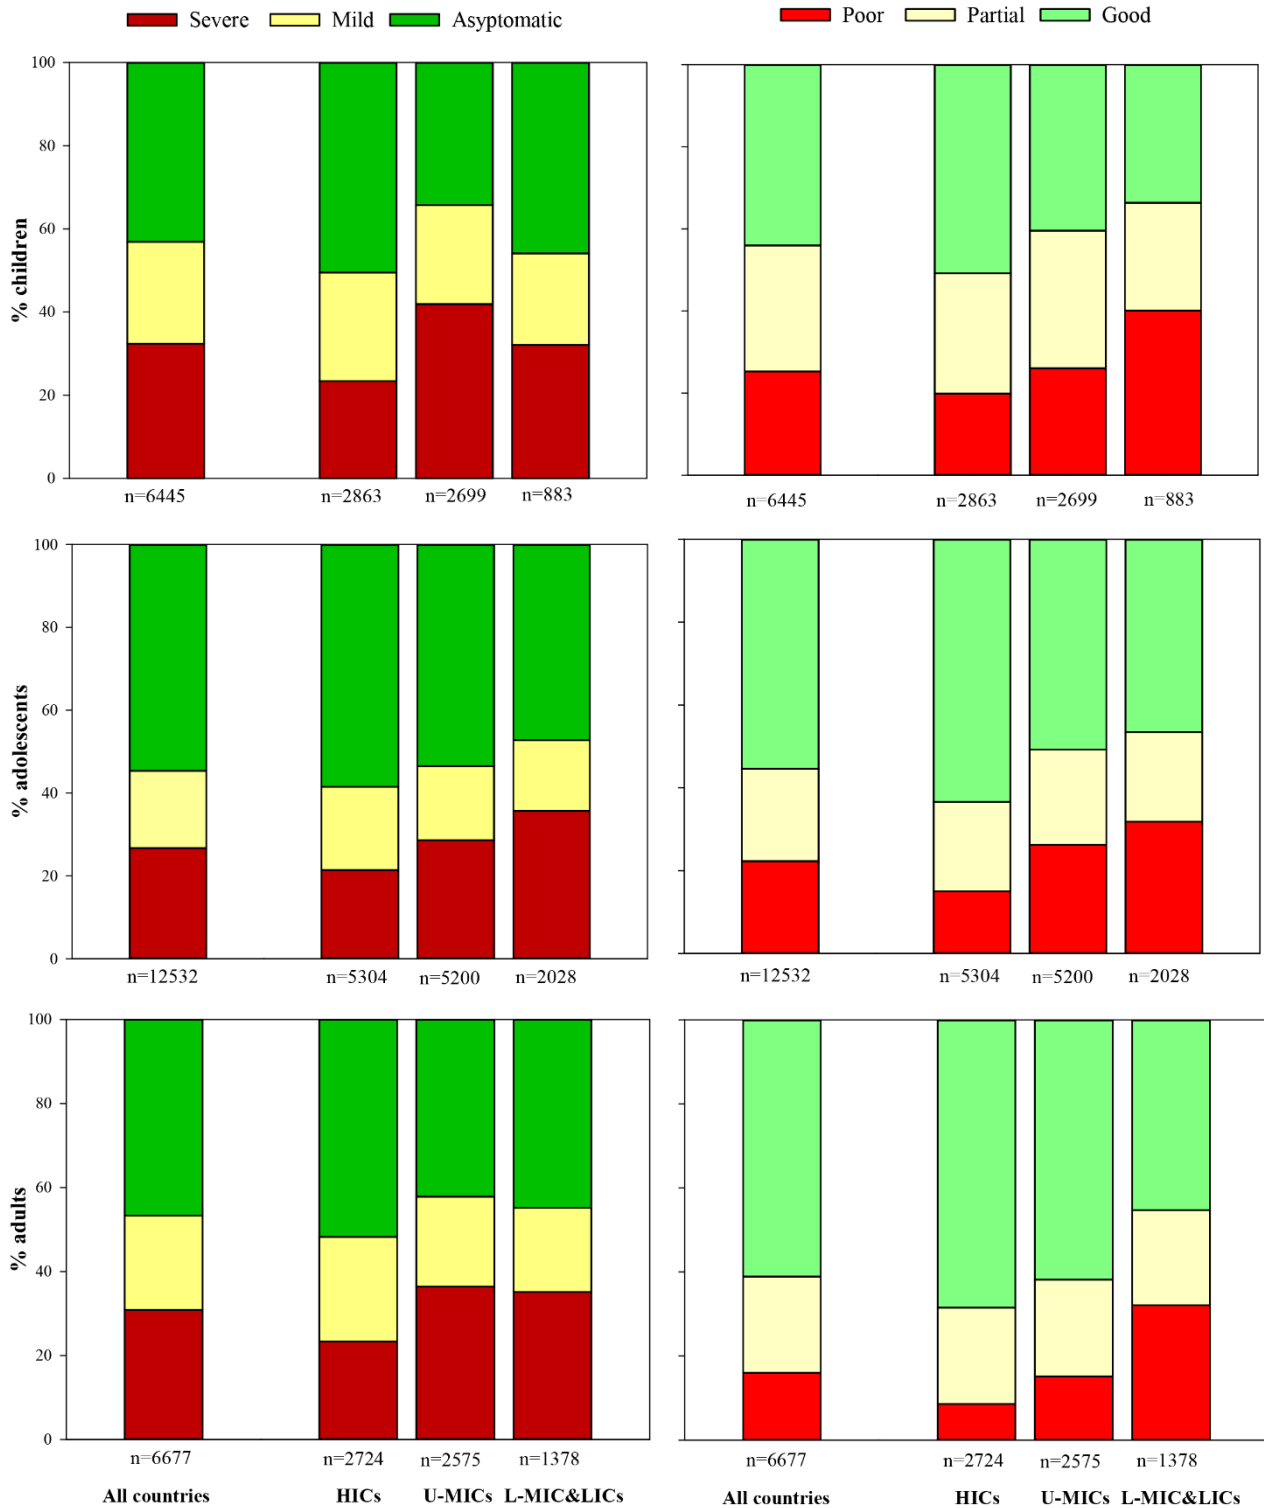

**Web figure 1. Proportions of A) severity of symptoms and B) degree of asthma control among children, adolescents, and adults in the whole populations and by country income category. See text for definitions of severity of symptoms and control. (HICs: High Income Countries; U-MICs: Upper-Middle Income Countries; L-MIC&LICs: Lower-Middle and Low Income Countries).**

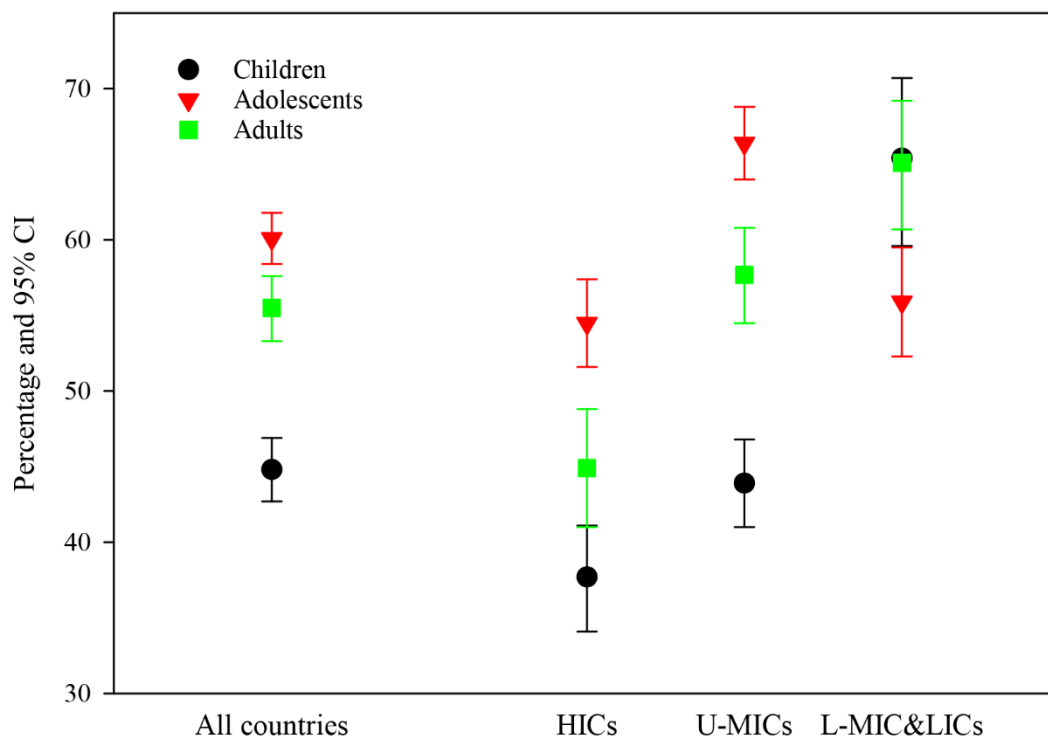

**Web figure 2. Proportion of children, adolescents and adults with severe symptoms who were not on inhaled corticosteroids with or without long-acting beta-2 agonists in the whole populations and stratified by country income category. (HICs: High Income Countries; U-MICs: Upper-Middle Income Countries; L-MIC&LICs: Lower-Middle and Low Income Countries).**

### **Global Asthma Network Study Group:**

Global Asthma Network Steering Group: MI Asher, Department of Paediatrics: Child and Youth Health, Faculty of Medical and Health Sciences, University of Auckland, Private Bag 92019, Auckland, New Zealand; K Bissell, School of Population Health, Faculty of Medical and Health Sciences, University of Auckland, Auckland, New Zealand; C-Y Chiang, International Union Against Tuberculosis and Lung Disease, Paris, France; and Division of Pulmonary Medicine, Department of Internal Medicine, Wan Fang Hospital, Taipei Medical University; and Division of Pulmonary Medicine, Department of Internal Medicine, School of Medicine, College of Medicine, Taipei Medical University 111 Hsin-Long Road, Section 3, Taipei, 116, Taiwan; A El Sony, Epidemiological Laboratory for Public Health and Research, Khartoum 3 Block3-Building 11, Khartoum, Sudan; P Ellwood, Department of Paediatrics: Child and Youth Health, Faculty of Medical and Health Sciences, Private Bag 92019, University of Auckland, Auckland, New Zealand; L García-Marcos, Pediatric Allergy and Pulmonology Units, Virgen de la Arrixaca University Children's Hospital, University of Murcia and IMIB Bioresearch Institute, Murcia; and ARADyAL Allergy Network, Edificio Departamental-Laib, Avenida Buenavista s/n, 30120 El Palmar, 30394 Murcia Spain; GB Marks, Respiratory & Environmental Epidemiology, University of New South Wales, Goulburn St, Sydney 2085, Sydney, Australia; K Mortimer, Liverpool School of Tropical Medicine, Pembroke Place, Liverpool L3 5QA, United Kingdom and Department of Paediatrics and Child Health, College of Health Sciences, School of Clinical Medicine, University of KwaZulu-Natal, Durban, South Africa; N Pearce, Department of Medical Statistics, London School of Hygiene & Tropical Medicine, Keppel Street, London WC1E 7HT, United Kingdom; DP Strachan, Population Health Research Institute, St George's, University of London, Cranmer Terrace, London SW17 0RE, United Kingdom.

### **Global Asthma Network International Data Centres:**

**GAN Global Centre:** P Ellwood, E Ellwood, MI Asher, Department of Paediatrics: Child and Youth Health, Faculty of Medical and Health Sciences, Private Bag 92019, University of Auckland, Auckland, New Zealand.

**Murcia, Spain:** L García-Marcos, Pediatric Allergy and Pulmonology Units, Virgen de la Arrixaca University Children's Hospital, University of Murcia and IMIB Bio-medical Institute, Murcia; and ARADyAL Allergy Network, Edificio Departamental-Laib, Murcia, Spain; V Perez-Fernández, Department of Paediatrics, University of Murcia, and IMIB Bio-medical Research Institute, Murcia, Edificio Departamental-Laib, Avenida Buenavista s/n, 30120 El Palmar, 30394 Murcia Spain; E Morales, Department of Public Health Sciences, University of Murcia, and IMIB Bio-medical Research Institute, Murcia, Edificio Departamental-Laib, Avenida Buenavista s/n, 30120 El Palmar, 30394 Murcia, Spain; A Martínez-Torres, Paediatric Allergy and Pulmonology Units and Nurse Research Group, Virgen de la Arrixaca University Children's Hospital, University of Murcia, and IMIB Bio-health Research Institute, Murcia, Edificio Departamental-Laib, Avenida Buenavista s/n, 30120 El Palmar, 30394 Murcia, Spain.

**London, United Kingdom:** DP Strachan, Population Health Research Institute, St George's, University of London, Cranmer Terrace, London SW17 0RE, United Kingdom N Pearce, S Robertson, CE Rutter, Department of Medical Statistics, London School of Hygiene & Tropical Medicine, Keppel Street, London WC1E 7HT, United Kingdom RJ Silverwood, Department of Medical Statistics, London School of Hygiene & Tropical Medicine, Keppel Street, London WC1E 7HT, United Kingdom and Centre for Longitudinal Studies, UCL Social Research Institute, University College London, 20 Bedford Way, London WC1H 0AL, United Kingdom.

**Global Asthma Network Principal Investigators:** Argentina: H Badellino, Clinica Regional Del Este, Pediatric Respiratory Medicine Department, Universidad de Ciencias Empresariales y Sociales (UCES), San Francisco, Argentina (San Francisco); Brazil: M Urrutia-Pereira, Department of Pediatric, Federal University of Pampa, (UNIPAMPA), Uruguaiana, RS, Brazil (Uruguaiana); Cameroon: AE Ndikum, The University of Yaounde 1, Yaounde, Cameroon (Yaounde); GA Ajeegah, The University of Yaounde 1 (Yaounde Adults); Chile: J Mallol, University of Santiago de Chile (USACH) (South Santiago); Costa Rica: ME Soto-Martínez, Respiratory Department, Hospital Nacional de Niños University de Costa Rica, San José, Costa Rica (Costa Rica); Ecuador: A Cabrera Aguilar, Universidad Central del Ecuador and Respiraclinic, Quito, Ecuador (Quito(2)); Greece: K Douros, Pediatric Allergy and Respiratory Unit, 3rd Department of Pediatrics, "Attikon" University Hospital, National and Kapodistrian University of Athens,

School of Medicine, Athens, Greece (Athens); K Priftis, National and Kapodistrian University of Athens (Athens Adults); Honduras: SM Sosa Ferrari, Instituto Nacional Cardiopulmonar (Tegucigalpa); J Sanchez, Instituto Nacional Cardiopulmonar (Tegucigalpa Adults); India: M. Sabir, Kothari Medical & Research Institute, Bikaner, India (Bikaner); SK Kochar, Sardar Patel Medical College (Bikaner Adults); M Singh, Postgraduate Institute of Medical Education and Research, Chandigarh, India (Chandigarh); V Singh\*, Asthma Bhawan, Jaipur, India (Jaipur); N Singh, Asthma Bhawan, Jaipur, India (Jaipur Adults); AG Ghoshal, National Allergy Asthma Bronchitis Institute, Kolkata, India (Kolkata (19)); N Sit, National Allergy Asthma Bronchitis Institute (Kolkata (19) Adults); TU Sukumaran, Pushpagiri Institute of Medical Sciences and Research, Thiruvalla, Kottayam, India (Kottayam); S Awasthi, King George's Medical University, Lucknow, India (Lucknow); PA Mahesh, JSS Medical College, JSSAHER, Mysuru, India (Mysuru); SK Kabra, All India Institute of Medical Sciences, New Delhi, India (New Delhi); S Sinha, All India Institute of Medical Sciences (New Delhi Adults); S Salvi, Chest Research Foundation, Pune, India (Pune); M Barne, Chest Research Foundation (Pune Adults); "Iran: M Tavakol, Non-Communicable Diseases Research Center, Alborz University of Medical Sciences, Karaj, Iran and Research Center for Immunodeficiencies, Pediatrics Center of Excellence, Children's Medical Center, Tehran University of Medical Science, Tehran, Iran (Karaj); N Behniafard, Shahid Sadoughi University of Medical Sciences (Yazd); Kingdom of Saudi Arabia: SA Alomary\*, General Directorate of Health Programs and Chronic Diseases, Ministry of Health, Riyadh, Kingdom of Saudi Arabia (Kingdom of Saudi Arabia); Kosovo: I Bucaliu-Ismajli, The Principal Center of Family Care (Ferizaj); L Pajaziti, University Hospital Clinic, Clinic of Dermatology, Prishtina, Kosovo (Gjakova); L Hana-Lleshi, General Hospital "Isa Grezda" Gjakova, Kosovo (Gjakova Adults); V Ghashi, Regional Hospital, "Sami Haxhibeqiri" Mitrovica, Kosovo (Gjilan); X Kurhasani, UBT College, Kosovo (Peja); B Gacaferrri-Lumezi, University of Prishtina "Hasan Prishtina", Medical Faculty, Kosovo (Peja 6-7); LN Ahmetaj\*, University of Prishtina "Hasan Prishtina", Medical Faculty, Kosovo (Prishtina); V Zhjeqi, University of Prishtina (Prizren); V Lokaj-Berisha, University of Prishtina (Prizren Adults); México: MG Sanchez Coronel, COMPEDIA (Colegio Mexicano de Pediatras Especialistas en Inmunología y Alergia) (Aguascalientes); HL Moreno Gardea, Hospital Angeles Chihuahua (Chihuahua); G Ochoa-Lopez, Department of Pediatric Allergology (Ciudad Juárez); R García-Almaráz, Hospital Infantil de Tamaulipas (Ciudad Victoria); JA Sacre Hazouri, Instituto Privado de Alergia, (Córdoba); N Rodriguez-Perez, Instituto de Ciencias y Estudios Superiores de Tamaulipas (Matamoros); MdJ Ambriz-Moreno, Hospital General de Matamoros, Tamaulipas Mexico, "Dr. Alfredo Pumarejo Lafaurie" (Matamoros Adults); JV Mérida-Palacio, Centro de Investigacion de Enfermedades Alergicas y Respiratorias (Mexicali); BE Del Río Navarro\*, Allergy and Clinical Immunology Department, Hospital Infantil de México Federico Gómez, México City, México (Mexico City North); OJ Saucedo-Ramirez, Hospital Angeles Pedregal (Mexico City North Adults); LO Hernández-Mondragón, CRIT de Michoacán (Michoacán); SN González-Díaz, Universidad Autónoma de Nuevo León (Monterrey); A Arias-Cruz, Hospital Universitario (Monterrey Adults); R Garcia-Muñoz, Universidad Regional del Sureste (Oaxaca); MdA Juan Pineda, Universidad de Guadalajara (Puerto Vallarta); Bdc Ramos García, Instituto Mexicano del Seguro Social (San Luis Potosí); CA Jiménez González, Universidad Autonoma of San Luis Potosí (San Luis Potosí Adults); AJ Escalante-Dominguez, Hospital General Tijuana [Isesalud] (Tijuana); FJ Linares-Zapién, Centro De Enfermedades Alergicas Y Asma de Toluca (Toluca Rural); EM Navarrete-Rodriguez, Hospital Infantil de México Federico Gómez, México City, México (Toluca Urban); J Santos Lozano, Medica san Angel (Xalapa); New Zealand: I Asher, Department of Paediatrics, Faculty of Medical and Health Sciences, University of Auckland, Auckland, New Zealand (Auckland); Nicaragua: JF Sánchez, Hospital Infantil Manuel de Jesús Rivera (Managua); Nigeria: AG Falade, University of Ibadan and University College Hospital, Ibadan, Nigeria (Ibadan); Poland: G Brożek, Medical University of Silesia, Katowice, Poland (Katowice); Russia: K Kuzmicheva, Department of Infectious Diseases, Allergology and Immunology, Tyumen State Medical University, Russia (Tyumen); South Africa: HJ Zar, SA MRC Unit on Child & Adolescent Health, Cape Town, South Africa (Cape Town); R Masekela, Department of Paediatrics and Child Health, Nelson R Mandela School of Clinical Medicine, College of Health Sciences, University of KwaZulu Natal, Durban, South Africa (Durban) and ; Spain: A López-Silvarrey Varela, Fundacion Maria Jose Jove (A Coruña); C González Díaz, Universidad del País Vasco UPV /EHU (Bilbao); A Bercedo Sanz, Cantabrian Health Service, Valdecilla Research Institute (IDIVAL), Dobra Health Center, Torrelavega, Cantabria, Spain (Cantabria); L García-Marcos\*, Pediatric Allergy and Pulmonology Units, Virgen de la Arrixaca University Children's Hospital, University of Murcia and IMIB Bio-health research Institute, and ARADyAL Allergy Network, Murcia, Spain (Cartagena); J Pellegrini Belinchon, Universidad de Salamanca (Salamanca); Sri Lanka: JC Ranasinghe, Teaching Hospital Peradeniya, Sri Lanka



(Anuradhapura); ST Kudagammana, University of Peradeniya, Sri Lanka (Peradeniya); Sudan: H El Sadig, Ministry of Health, The Epidemiological Laboratory (Epi-Lab), Khartoum, Sudan (Gadarif); M Noor, School of Health Science, Kristiania University College, Oslo, Norway - Epidemiological Laboratory (Epi-Lab), Khartoum, Sudan (Khartoum); Syrian Arab Republic: G Alkhayer, Damascus university, Syrian Private University, Syrian Arab Republic (Damascus); G Dib, National Center for research and training for chronic respiratory disease and co-morbidities, Tishreen University, Lattakia, Syrian Arab Republic (Lattakia); Y Mohammad\*, Director of the National Center for research and training for chronic respiratory disease and co-morbidities, Tishreen University, Latakia and Syrian Private University -Damascus, Syrian Arab Republic (Lattakia 6-7); Taiwan: J-L Huang, Department of Pediatrics, Chang Gung Memorial Hospital, New Taipei Municipal TuChen Hospital, and Chang Gung University, Taiwan (Taipei); K-W Yeh, Chang Gung University, Taipei, Taiwan (Taipei Adults); Thailand: S Chinratanapisit, Department of Pediatrics, Bhumibol Adulyadej Hospital, Royal Thai Air Force, Bangkok, Thailand (Bangkok).

\*National Coordinators

**Global Asthma Network National Co-ordinators not named above:** Brazil: D Solé, Division of Allergy and Clinical Immunology, Department of Pediatrics, Escola Paulista de Medicina, Federal University of São Paulo, São Paulo, Brazil; Costa Rica: ME Soto-Quirós, Universidad de Costa Rica, San José, Costa Rica; Kingdom of Saudi Arabia: WA Althagafi, General Directorate of Health Programs and Chronic Diseases, Ministry of Health, Riyadh, Kingdom of Saudi Arabia; Sudan: A El Sony, Epidemiological Laboratory (Epi-Lab) for Public Health, Research and Development, Khartoum, Sudan; Thailand: P Vichyanond, Mahidol University, Bangkok, Thailand.
